# Supplementary material
Source: HighWire-hosted journal article supplement (https://www.cmajopen.ca/highwire/filestream/80928/field_highwire_adjunct_files/1/open-2014-0069-original-submission.pdf)
Supplement: open-2014-0069-original-submission.pdf [file open-2014-0069-original-submission.pdf]

1  
2  
3  
4  
5  
6 Low screening prevalence among small areas by demographic, socioeconomic, and primary care  
7 characteristics: towards neighbourhood-level action plans for improved participation.  
8  
9

10  
11 <sup>1</sup>Kimberly A. Fernandes MSc, <sup>1,2,6</sup>Rinku Sutradhar PhD, <sup>3</sup>Cornelia M. Borkhoff PhD, <sup>1,4,5,6</sup>Nancy  
12 Baxter MD PhD, <sup>1,4,5,6</sup>Aisha Lofters MD PhD, <sup>1,2,5,6</sup>Linda Rabeneck MD MPH, <sup>1,5,6</sup>Jill Tinmouth  
13 MD PhD, <sup>1,2,5,6</sup>Lawrence Paszat MD MS.  
14  
15

16 <sup>1</sup>Institute for Clinical Evaluative Sciences  
17

18 <sup>2</sup>Dalla Lana School of Public Health  
19

20 <sup>3</sup>Hospital for Sick Children  
21

22 <sup>4</sup>St Michael's Hospital  
23

24 <sup>5</sup>Institute for Health Policy Management and Evaluation  
25

26 <sup>6</sup>University of Toronto  
27  
28  
29  
30  
31

32 **on behalf of the investigators of Ontario Cancer Screening Research Network**  
33  
34  
35

36 corresponding author:  
37

38 Lawrence Paszat BA MD MS FRCPC  
39

40 Senior Scientist  
41

42 Institute for Clinical Evaluative Sciences  
43

44 G106 2075 Bayview Avenue  
45

46 Toronto ON M4N3M5  
47

48 416 480 4055  
49

50 lawrence.paszat@ices.on.ca  
51  
52  
53  
54  
55  
56  
57  
58  
59  
60

1  
2  
3 ABSTRACT  
45  
6 *Background:*  
7

8 Although screening is broadly promoted, demographic and socioeconomic factors are  
9 associated with low participation in Ontario and elsewhere. We describe participation in  
10 screening among small areas in Ontario, comparing areal to individual level results.  
11  
12

13 *Methods:*  
14

15 We conducted a retrospective cohort study of persons eligible for any screening tests in  
16 Ontario. Using administrative health care databases, participation as of December 31, 2011 was  
17 determined, and linked to residential, demographic, socioeconomic, and primary care  
18 descriptors. Screening prevalence ratios (PR) comparing participation among most to least  
19 deprived strata were calculated. Factors associated with participation among individuals with,  
20 and without, an identifiable physician were evaluated. We used generalized estimating equations  
21 (GEE) with an exchangeable correlation matrix to account for clustering among persons by  
22 physician.  
23  
24  
25  
26  
27  
28

29 *Results:*  
30

31 Median prevalence among small areas declined with increasing percent without high  
32 school completion - PR for all tests 0.67 (95% CI 0.66-0.69) and 0.74 (95% CI 0.73-0.76) for  
33 females and males, respectively; decreasing socioeconomic quintile - PR 0.65 (95% CI 0.64-  
34 0.66) and 0.69 (95% CI 0.67-0.70) ; and decreasing percent of persons with an identifiable  
35 physician - PR 0.71 (95% CI 0.69-0.72) and 0.66 (95% CI 0.65-0.67). Stratified individual-level  
36 modeling among persons with, and without, a physician showed similar association between low  
37 education, low income and recency of immigration with low participation in screening.  
38  
39  
40  
41  
42

43 *Interpretation:*  
44

45 Associations are similar in areal and individual level analyses. We recommend using  
46 these data in geographic information systems (GIS) to focus attention on areas where  
47 participation is low, for efforts to improve participation.  
48  
49  
50  
51  
52  
53  
54  
55  
56  
57  
58  
59  
60

## Introduction

Disease burden has varied geographically among large regions and small areas for centuries. Understanding this variation, and appropriate action in response, was one of the goals in the development of public health. In wealthy societies, disease burden varies geographically, by demographic, and by sociodemographic factors. Mortality from major circulatory diseases and common cancers is invariably highest among areas of low income<sup>1-5</sup>. Although the highest incidence of breast cancer is among areas of highest income, breast cancer mortality is always highest among areas of lowest income. Regardless of the funding model for health care, utilization of screening services is lowest among the most deprived in Ontario, Canada and the US<sup>6-18</sup>.

Using 'small area'-based methods<sup>19,20</sup>, we have recently shown the association of lower utilization of cervical, colorectal, breast, glucose and cholesterol screening with neighbourhood level factors of deprivation in Ontario as of December 31, 2009, among persons unaffected by prior diagnoses of cancer, diabetes mellitus, or myocardial infarction<sup>12</sup>. In order to explain this association, this paper examines the relationship as of December 31, 2011, across a wider range of demographic, socioeconomic<sup>21,22</sup> and primary care characteristics. This paper also examines if areal methods produce results similar to individual level methods.

## Methods

We obtained approval for this study from the Research Ethics Board at Sunnybrook Health Sciences Centre in Toronto, Ontario, Canada, and conducted the work at the Institute for Clinical Evaluative Sciences.

## Study Population

We conducted a population-based retrospective cohort study using linked administrative databases to examine uptake of cervical, colorectal, breast, glucose and cholesterol screening, as of December 31, 2011, among age-eligible residents of Ontario, Canada. Eligibles were identified from the Registered Persons Database by age, by residential code, and an encrypted version of the Ontario Health Insurance number which facilitates deterministic linkage to a wide range of health services databases and ecologic linkage to census variables. Persons already affected by these chronic diseases were excluded from the study population using the Ontario Cancer Registry, the Ontario Diabetes Database and the Ontario Myocardial Infarction Database.

Location of residence was assigned to census dissemination areas (DA), the smallest censal unit, which is derived from adjacent census enumeration areas in order to reduce the risk of identification of any one individual. In general we will refer to dissemination areas as 'small areas,' except when abbreviation is required, in which case we will use 'DA.' The named roads which bound and transect these small areas are readily visualized by geographic information systems (GIS).

Ascertainment of screen eligible-cohorts for each of five tests among women and each of three tests among men, and uptake of tests among these cohorts by censal areas have been described by us previously for 2009<sup>12</sup>. Box 1 summarizes the screening cohort eligibility criteria and the databases used to determine the uptake of tests.

## Access to chronic disease screening in Ontario

Screening for cervical, colorectal, and breast cancer in Ontario have some programmatic aspects (Ontario Breast Screening Programme, for which eligible women may self-refer), but cervical and colorectal screening always requires a conscious choice, by a physician or nurse, and a person, in the same clinical room, to participate every time, and followup coordination falls to the physician or nurse. This is also true among women who attend radiology services other than the Ontario Breast Screening Programme for breast screening. Glucose and cholesterol screening

1  
2  
3 is at the discretion of the physician or nurse and the person. Most of the testing we can identify is  
4 performed in the community setting, with the exception of breast screening and large bowel  
5 endoscopy in institutional settings.  
6  
7

8  
9 While all permanent residents in Ontario are fully insured for all screening activities and  
10 their followup, it is up to each permanent resident to find a physician on arrival in Ontario, after  
11 moving within Ontario, and sometimes after a physician moves away or retires. Physicians are  
12 not obligated to take on a patient who does not have a physician, and in general, are not obligated  
13 to practice in a poorly served neighbourhood or region. None of these are major barriers for  
14 most middle and upper income persons; however, low income persons with or without other  
15 deprivations may not be able to travel to a physician at a distance from their residence, to  
16 identify a physician, or attend during normal working hours.  
17  
18  
19  
20  
21  
22

### 23 **Description and analysis by small areas**

24 From information collected at the 2006 census, each small area was described by rural  
25 versus urban residence, by quintiles of median household income among urban residence, by  
26 percent without high school completion, and by percent among whom neither official language  
27 is spoken at home. By agreement of its data custodian, the Citizenship and Immigration and  
28 Canada database (CIC) was used to determine the proportion of each small area who had  
29 immigrated during the past 27 years with the intention to reside in Ontario, by time since arrival.  
30 From the Ontario Health Insurance Plan physician billing claims database (OHIP), the following  
31 were tabulated by small area: percent of screen eligibles with an identifiable primary care  
32 physician, the univariate distribution of primary care visits between January 1, 2010 and  
33 December 31, 2011, the Patient Enrollment Model (PEM) status of eligible persons and of  
34 physicians who attended them, as well as age, sex, years in practice, and country of medical  
35 graduation, all by percent.  
36  
37  
38  
39  
40  
41  
42  
43  
44  
45

46 Small areas were categorized for each continuous variable based on distributional cut-  
47 offs (those among the 0-10<sup>th</sup> percentile were categorized as low and those among the 90-100<sup>th</sup>  
48 percentile were categorized as high). The percentage of each disease-specific screen-eligible  
49 cohort receiving the relevant testing (the screening prevalence) was calculated for each category,  
50 looking back three years prior to December 31, 2011 for cervical and breast screening, five years  
51 for glucose and cholesterol, and two years for colorectal stool testing or five years for flexible  
52 sigmoidoscopy or 10 years for colonoscopy. Prevalence ratios comparing the most extreme  
53  
54  
55  
56  
57  
58  
59  
60

1  
2  
3 groups (prevalence among lowest income quintile areas divided by highest quintiles, for  
4 example) were then calculated for each variable. 95% confidence intervals were calculated using  
5 bootstrapping methods<sup>24</sup>.  
6  
7

8  
9 We assembled the data so that the small area information could be readily evaluated  
10 neighbourhood by neighbourhood, visually, using Geographic Information Systems (GIS)<sup>23</sup>.  
11 The intended users would be public agencies, primary care providers, and by organizations of  
12 civil society, who would be able to identify the areas with poorest participation, identify  
13 information about deprivation within the small areas, and to plan action to improve participation  
14 among those geographically defined and demographically characterized small areas.  
15  
16  
17  
18

### 19 **Individual-level description and analysis**

20  
21 We also described all individuals by the small area and individual level variables. In  
22 addition to computing rates among individuals, we also computed the percent of eligibles who  
23 participated in all types of testing for which they were eligible, and the percent who participated  
24 in one or more types of testing.  
25  
26  
27

28 Five multivariable logistic regression models were used to evaluate factors associated  
29 with uptake of each screening test at the individual level, stratified by whether or not it was  
30 possible to identify a particular primary care physician for the individual.  
31  
32

33 Among those for whom a primary care physician was identified, models were run on a  
34 random sample of 1,000,000 individuals, so that DA, physician, and patient characteristics could  
35 be evaluated simultaneously. The generalized estimating equation (GEE) method was used to  
36 account for the clustering of individuals by physician, using an exchangeable correlation matrix.  
37 A random sample was required due to the population size. The five models were repeated  
38 without physician-level variables among all individuals without an identifiable physician.  
39  
40  
41  
42  
43

44 The functional form of continuous variables was examined graphically using restricted  
45 cubic splines<sup>25</sup>. Continuous variables displaying non-linear relationships for any of the five  
46 outcomes were categorized for all models using distributional cut-offs for ease of presentation  
47 and interpretation. Multi-collinearity between variables was evaluated using a variance inflation  
48 factor of 10 or higher<sup>26</sup>, resulting in the inclusion of the following variables: individual  
49 characteristics (sex, age, number of visits to a primary care physician within the last two years,  
50 CIC status, and PEM status), DA characteristics (neighbourhood income quintile, percent of DA  
51 who had not completed high school, percent of DA whose home language was not English or  
52  
53  
54  
55  
56  
57  
58  
59  
60

1  
2  
3 French), and physician characteristics (country of medical education and number of years since  
4 graduation). The 32 distinct Aggregated Diagnosis Groups (ADGs) from the Johns Hopkins  
5 Adjusted Clinical Groups Case-Mix System were included as indicator variables in the  
6 multivariable models for adjustment. This system uses diagnostic information from  
7 administrative databases to describe and predict patients' use of health care resources<sup>27</sup>.  
8  
9

10  
11 For each of the five models, the variable pairs 'age and sex', the '32 ADG indicator  
12 variables and age,' the 'number of years since immigration and median household income  
13 quintile', and the primary care physicians' 'age and sex' were hypothesized *a priori* to have  
14 significant interactions that were tested using the score statistic for type III p-values for GEE  
15 analysis.  
16  
17  
18  
19  
20  
21  
22  
23  
24  
25  
26  
27  
28  
29  
30  
31  
32  
33  
34  
35  
36  
37  
38  
39  
40  
41  
42  
43  
44  
45  
46  
47  
48  
49  
50  
51  
52  
53  
54  
55  
56  
57  
58  
59  
60

Confidential

## Results

### *Results from small areas*

Table 1 summarizes the socio-demographic characteristics and median screening prevalence of the 6,656,632 screen-eligible persons among 18,951 small areas. Among the various cohorts are areas with very high median ages, very high percentage of persons (1) without high school completion (90-100<sup>th</sup> percentile: 35-100%), (2) whose home language is neither English nor French (90-100<sup>th</sup> percentile: 6-55%), (3) who are recent immigrants (90-100<sup>th</sup> percentile: 11-52%), (4) who have few if any recent primary care visits (0-10<sup>th</sup> percentile: 0-2 visits per year), (5) who are not enrolled with a PEM physician (90-100<sup>th</sup> percentile: 35-100%), and (6) who cannot be linked to any individual primary care physician (90<sup>th</sup>-100<sup>th</sup> percentile: 15-100%).

Figure 1 illustrates the median screening prevalence among small areas stratified by cohort and resident characteristics. Median screening prevalence for each test declines with increasing percent of persons without high school completion, decreasing percent of persons with an identifiable primary care physician, with lower income quintile and lower median number of recent primary care visits from any provider. As the percent of recent immigrants increases, median screening prevalence decreases for cancer tests but increases for glucose and cholesterol tests (not shown).

Figure 1 also illustrates the large difference between the percent with participation in any test and the percent with participation in all tests for which they are eligible, which is observed across the range of percent high school completion, median household income, number of primary care visits, and having an identifiable primary care physician.

### *Individual level results*



1  
2  
3 Complete case analyses were carried out due to the low percentage of persons with  
4 incomplete data among the cohorts (less than 1%). None of the interaction terms defined *a*  
5 *priori* substantially changed effect estimates and hence were not included in the models.  
6  
7

8  
9  
10 Figures 2a and 2b illustrate that a lower income quintile and a higher percentage of persons  
11 whose home language was not English or French contributed to a significantly decreased odds of  
12 being screened for any test. Being a more recent immigrant was associated with decreased odds  
13 of cancer screening. Odds of cervical cancer screening decreased for females aged 60 or older.  
14  
15 Individuals with a physician were less likely to be screened if they or their physicians were not  
16 part of a physician enrollment model, or if their physician was male, was internationally trained,  
17 or was trained within the last 25 years.  
18  
19  
20  
21  
22  
23  
24  
25  
26  
27  
28  
29  
30  
31  
32  
33  
34  
35  
36  
37  
38  
39  
40  
41  
42  
43  
44  
45  
46  
47  
48  
49  
50  
51  
52  
53  
54  
55  
56  
57  
58  
59  
60

## Interpretation

In Ontario, participation in each of the five screening tests for women, and each of the three for men, is lower among small areas with lower high school completion, lower urban median household income, lower average number of primary care visits by any physician, and lower proportion of persons with an identifiable primary care physician. There is a large difference between the percent with participation in any one or more of the tests for which they are eligible, and the percent with participation in all tests for which they are eligible, observed across the values of these important ecologic variables. Adjusted analyses among all eligible individual residents of Ontario demonstrate associations between participation in each test, by eligible persons, and these ecologic variables. It was beyond the scope of this work to evaluate the followup of abnormal screening tests, however, followup of abnormal results might also vary by the same demographic, socioeconomic, and primary care factors<sup>9</sup>.

Ecologic variables have been derived by Statistics Canada from responses collected at the 2006 Canadian census, after which several years elapsed prior to the computation date for screening participation, December 31, 2011. However, the 2011 census data are not yet available, and many items in the 2006 census were no longer mandatory in the 2011 census.

The large proportion per small area with participation in one or more tests may reflect several factors: (1) there are multiple potential access points for the community laboratory tests and breast screening; (2) there is some misclassification of diagnostic testing as screening, in that one or two tests in which some persons have participated, might have been to diagnose the cause of symptoms or clinical signs. Although there is no record of the screening versus diagnostic intention of any of these tests, persons already affected by those cancers, diabetes, or myocardial infarction have been excluded from the study population, and the annual incidence of new cases of these diseases is very small compared to the volumes tested.

There is a sizable proportion of eligibles who have completed all tests for whom they are eligible. There is no provincial strategy to promote completion of all tests rather than each test as a discrete episode, and the interscreening interval of periodicity varies between two years and 10 years. The proportion completing all tests is much smaller than the proportion with one or more tests completed. Completion of all tests may reflect the ideal of comprehensive screening at some primary care practice locations, facilitated by either physicians or nurses. Ontario has provided financial incentives based on the proportion of screened eligibles in physician's

1  
2  
3 practices since 2005, although there is no evidence that this has been effective at improving  
4 participation in screening those previously eligible but unscreened<sup>28</sup>.  
5  
6

7 On the basis of (1) decreased participation associated with ecologic measures of  
8 demography and socioeconomic status, and (2) the minority of persons among all small areas  
9 who have completed all tests for which they are eligible, across ecologic variables from most  
10 deprived to most favourable, we recommend that small area level characterizations be made  
11 available in GIS format, as Cancer Care Ontario has created. These areas can be seen in GIS  
12 bounded and transected by major streets and roadways. This should be available to all potential  
13 users (public agencies, primary care practitioners, and organizations of civil society), after  
14 appropriate training about protecting the data, which are composed of personal health  
15 information despite being aggregate (no counts or percents reflecting < 6 persons), anonymous,  
16 and impossible to link to any personal identity. The GIS containing these data should be used for  
17 developing and delivering strategies that intervene at the neighbourhood / community level to  
18 improve screening participation in Ontario, especially among small areas with low screening  
19 participation and lower average primary care visits.  
20  
21  
22  
23  
24  
25  
26  
27  
28  
29  
30  
31  
32  
33  
34  
35  
36  
37  
38  
39  
40  
41  
42  
43  
44  
45  
46  
47  
48  
49  
50  
51  
52  
53  
54  
55  
56  
57  
58  
59  
60

## References

1. Mackillop WJ, Zhang-Salomons J, Groome PA, Paszat L, Holowaty E. Socioeconomic status and cancer survival in Ontario. *J Clin Oncol*. 1997 Apr;15(4):1680-9.
2. Gorey KM, Holowaty EJ, Laukkanen E, Fehringer G, Richter NL. Association between socioeconomic status and cancer incidence in Toronto, Ontario: possible confounding of cancer mortality by incidence and survival. *Cancer Prev Control*. 1998 Oct;2(5):236-41.
3. Boyd C, Zhang-Salomons JY, Groome PA, Mackillop WJ. Associations between community income and cancer survival in Ontario, Canada, and the United States. *J Clin Oncol*. 1999 Jul;17(7):2244-55.
4. Gorey KM, Holowaty EJ, Fehringer G, Laukkanen E, Richter NL, Meyer CM. An international comparison of cancer survival: relatively poor areas of Toronto, Ontario and three US metropolitan areas. *J Public Health Med*. 2000 Sep;22(3):343-8.
5. Mackillop WJ, Zhang-Salomons J, Boyd CJ, Groome PA. Associations between community income and cancer incidence in Canada and the United States. *Cancer*. 2000 Aug 15;89(4):901-12.
6. Lofters A, Glazier RH, Agha MM, Creatore MI, Moineddin R. Inadequacy of cervical cancer screening among urban recent immigrants: a population-based study of physician and laboratory claims in Toronto, Canada. *Prev Med*. 2007 Jun;44(6):536-42.
7. Lofters AK, Moineddin R, Hwang SW, Glazier RH. Low rates of cervical cancer screening among urban immigrants: a population-based study in Ontario, Canada. *Med Care*. 2010 Jul;48(7):611-8.
8. Lofters AK, Moineddin R, Hwang SW, Glazier RH. Predictors of low cervical cancer screening among immigrant women in Ontario, Canada. *BMC Womens Health*. 2011 May 27;11:20.
9. Elit L, Krzyzanowska M, Saskin R, Barbera L, Razzaq A, Lofters A, Yeritsyan N, Bierman A. Sociodemographic factors associated with cervical cancer screening and follow-up of abnormal results. *Can Fam Physician*. 2012 Jan;58(1):e22-31.
10. Lofters AK, Gozdyra P, Lobb R. Using geographic methods to inform cancer screening interventions for South Asians in Ontario, Canada. *BMC Public Health*. 2013 Apr 26;13:395.
11. Honein-AbouHaidar GN, Baxter NN, Moineddin R, Urbach DR, Rabeneck L, Bierman AS. Trends and inequities in colorectal cancer screening participation in Ontario, Canada, 2005-2011. *Cancer Epidemiol*. 2013 Dec; 37(6):946-56.

12. Borkhoff CM, Saskin R, Rabeneck L, Baxter NN, Liu Y, Tinmouth J, Paszat LF. Disparities in receipt of screening tests for cancer, diabetes and high cholesterol in Ontario, Canada: a population-based study using area-based methods. *Can J Public Health*. 2013 Jun 21;104(4):e284-90.
13. Katz SJ, Hofer TP. Socioeconomic disparities in preventive care persist despite universal coverage. Breast and cervical cancer screening in Ontario and the United States. *JAMA*. 1994 Aug 17;272(7):530-4.
14. Katz SJ, Zemencuk JK, Hofer TP. Breast cancer screening in the United States and Canada, 1994: socioeconomic gradients persist. *Am J Public Health*. 2000 May;90(5):799-803.
15. Singh SM, Paszat LF, Li C, He J, Vinden C, Rabeneck L. Association of socioeconomic status and receipt of colorectal cancer investigations: a population-based retrospective cohort study. *CMAJ*. 2004 Aug 31;171(5):461-5.
16. Wilson SE, Rosella LC, Lipscombe LL, Manuel DG. The effectiveness and efficiency of diabetes screening in Ontario, Canada: a population-based cohort study. *BMC Public Health*. 2010 Aug 20;10:506.
17. Creatore MI, Booth GL, Manuel DG, Moineddin R, Glazier RH. Diabetes screening among immigrants: a population-based urban cohort study. *Diabetes Care*. 2012 Apr;35(4):754-61.
18. Siddiqi A, Zuberi D, Nguyen QC. The role of health insurance in explaining immigrant versus non-immigrant disparities in access to health care: comparing the United States to Canada. *Soc Sci Med*. 2009 Nov;69(10):1452-9.
19. Oliver LN, Hayes MV. Does choice of spatial unit matter for estimating small-area disparities in health and place effects in the Vancouver Census Metropolitan Area? *Can J Public Health*. 2007 Jul-Aug;98 Suppl 1:S27-34.
20. Meijer M, Bloomfield K, Engholm G. Neighbourhoods matter too: the association between neighbourhood socioeconomic position, population density and breast, prostate and lung cancer incidence in Denmark between 2004 and 2008. *J Epidemiol Community Health*. 2013 Jan;67(1):6-13.
21. Glazier RH, Creatore MI, Agha MM, Steele LS. Socioeconomic misclassification in Ontario's Health Care Registry. *Can J Public Health*. 2003 Mar-Apr;94(2):140-3.
22. Zhang-Salomons J, Qian H, Holowaty E, Mackillop WJ. Associations between socioeconomic status and cancer survival: choice of SES indicator may affect results. *Ann Epidemiol*. 2006 Jul;16(7):521-8.

- 1
  - 2
  - 3
  - 4
  - 5
  - 6
  - 7
  - 8
  - 9
  - 10
  - 11
  - 12
  - 13
  - 14
  - 15
  - 16
  - 17
  - 18
  - 19
  - 20
  - 21
  - 22
  - 23
  - 24
  - 25
  - 26
  - 27
  - 28
  - 29
  - 30
  - 31
  - 32
  - 33
  - 34
  - 35
  - 36
  - 37
  - 38
  - 39
  - 40
  - 41
  - 42
  - 43
  - 44
  - 45
  - 46
  - 47
  - 48
  - 49
  - 50
  - 51
  - 52
  - 53
  - 54
  - 55
  - 56
  - 57
  - 58
  - 59
  - 60
23. Holowaty EJ, Norwood TA, Wanigaratne S, Abellan JJ, Beale L. Feasibility and utility of mapping disease risk at the neighbourhood level within a Canadian public health unit: an ecological study. *Int J Health Geogr.* 2010 May 10;9:21.
24. Davison AC, Hinkley DV. *Bootstrap methods and their application.* 1<sup>st</sup> ed. Cambridge: Cambridge university press; 1997.
25. Hanley J, Negassa A, Edwardes M, Forrester J. Statistical analysis of correlated data using generalized estimating equations: an orientation. *Am J Epidemiol* 2003;157(4): 364-75.
26. Kutner MH, Nachtsheim CJ, Neter J, *Applied Linear Regression Models.* 4th ed. Chicago: McGraw-Hill Irwin, 2004.
27. Harrell, FE. *Regression Modeling Strategies: with applications to linear models, logistic regression, and survival analysis.* New York: Springer-Verlag New York; 2001.

**Box 1. Inclusion and Exclusion Criteria for the various screening cohorts.**

| Screening Cohort | Ages, Sex                               | Eligibility for Screening Cohorts (denominator)                                                                 |                                                                        | Uptake of Tests (numerator)                      |                                                                |
|------------------|-----------------------------------------|-----------------------------------------------------------------------------------------------------------------|------------------------------------------------------------------------|--------------------------------------------------|----------------------------------------------------------------|
|                  |                                         | Included (database)                                                                                             | Excluded (database)                                                    | Test (database)                                  | Look-back window*                                              |
| Colorectal       | 50-74 years, men and women              | Alive at any time during 2011 calendar year<br>Age within specified range at any time during 2011 calendar year | History of colorectal cancer (OCR) or surgical removal of colon (CIHI) | FOBT or Flex-Sig or large bowel endoscopy (OHIP) | 2 years for FOBT, 5 years for Flex-Sig, 10 years for endoscopy |
| Breast           | 50-74 years, women                      | Ontario resident registered in the Registered Persons Database (RPDB)                                           | History of breast cancer (OCR) or bilateral mastectomy (CIHI/OHIP)     | Mammography (OBSP or OHIP)                       | 2 years                                                        |
| Cervical         | 30-69 years, women                      | Valid Ontario health Insurance (OHIP) number                                                                    | History of cervical cancer (OCR) or hysterectomy (CIHI/OHIP)           | Pap test (CytoBase or OHIP)                      | 3 years                                                        |
| Glucose          | 40-74 years, men and women              | Patient a resident of Ontario for at least 2 years as of December 31, 2011                                      | Diagnosis of diabetes (ODD)                                            | Serum blood glucose test (OHIP)                  | 3 years                                                        |
| Cholesterol      | 50-74 years, women and 40-74 years, men | In contact with the health care system within the last 6 years                                                  | Diagnosis of MI (OMID)                                                 | Serum blood cholesterol test (OHIP)              | 5 years                                                        |

\*The look-back window reflects the recommended screening interval for each test. There are different look-back windows because each test has a different recommended screening interval according to each specific screening guideline. For example, a woman who is screen-eligible for a Pap test in 2011 is recommended to have a Pap every 3 years. To identify whether she had one, we used the OHIP and CytoBase databases to find any record of her having a Pap test during the 3-year period (or look-back window) from 2008-2011 inclusive. OCR=Ontario Cancer Registry; CIHI=Canadian Institute for Health Information; FOBT=fecal occult blood test; OBSP=Ontario Breast Screening Program; ODD=Ontario Diabetes Database; OMID=Ontario Myocardial Infarction Database.

**Table 1.** Descriptive Statistics of the 8 Screen-eligible cohorts – patient characteristics.

|                                                                    | Women         |               |               |               |               | Men           |               |               |
|--------------------------------------------------------------------|---------------|---------------|---------------|---------------|---------------|---------------|---------------|---------------|
| Characteristic                                                     | Colorectal    | Breast        | Cervical      | Glucose       | Cholesterol   | Colorectal    | Glucose       | Cholesterol   |
| No. screen-eligible patients                                       | 1,919,046     | 1,890,329     | 3,199,197     | 2,598,759     | 1,935,221     | 1,819,904     | 2,410,743     | 2,782,569     |
| No. DAs w/ screen-eligible patients                                | 18,944        | 18,944        | 18,947        | 18,946        | 18,943        | 18,939        | 18,948        | 18,950        |
| <b>Screen-eligible patient characteristics summarized over DAs</b> |               |               |               |               |               |               |               |               |
| No. screen-eligible patients                                       |               |               |               |               |               |               |               |               |
| Mean (SD)                                                          | 101 (78)      | 100 (77)      | 169 (193)     | 137 (122)     | 102(79)       | 96 (73)       | 127.23 (114)  | 147 (133)     |
| 0-10 <sup>th</sup> percentile                                      | 1-51          | 1-50          | 1-86          | 1-71          | 1-51          | 1-50          | 1-67          | 1-78          |
| Median (IQR)                                                       | 85 (66-113)   | 84 (65-111)   | 132 (106-175) | 114 (90-149)  | 86 (67-114)   | 82 (64-108)   | 106 (85-139)  | 121 (98-159)  |
| 90-100 <sup>th</sup> percentile                                    | 160-3,407     | 158-3,355     | 262-10,811    | 214-6,426     | 162-3,439     | 151-3,501     | 196-6,197     | 227-7,131     |
| Median age                                                         |               |               |               |               |               |               |               |               |
| Mean (SD)                                                          | 59 (2)        | 59.36 (2.13)  | 48.74 (3.40)  | 53.48 (2.88)  | 59.44 (2.14)  | 59.24 (2.09)  | 52.98 (2.70)  | 53.92 (2.75)  |
| 0-10 <sup>th</sup> percentile                                      | 50-57         | 50-57         | 31-45         | 40-50         | 50-57         | 50-57         | 40-50         | 40-51         |
| Median (IQR)                                                       | 59 (58-61)    | 59 (58-61)    | 49 (47-51)    | 53 (52-55)    | 59 (58-61)    | 59 (58-61)    | 59 (58-61)    | 53 (51-55)    |
| 90-100 <sup>th</sup> percentile                                    | 62-75         | 62-75         | 53-68         | 57-75         | 62-75         | 62-75         | 56-75         | 57-73         |
| % not completed high school                                        |               |               |               |               |               |               |               |               |
| Mean (SD)                                                          | 19.32 (11.54) | 19.32 (11.54) | 19.32 (11.54) | 19.31 (11.53) | 19.31 (11.53) | 19.32 (11.54) | 19.32 (11.54) | 19.32 (11.54) |
| 0-10 <sup>th</sup> percentile                                      | 0-6           | 0-6           | 0-6           | 0-6           | 0-6           | 0-6           | 0-6           | 0-6           |
| Median (IQR)                                                       | 18 (11-26)    | 18 (11-26)    | 18 (11-26)    | 18 (11-26)    | 18 (11-26)    | 18 (11-26)    | 18 (11-26)    | 18 (11-26)    |
| 90-100 <sup>th</sup> percentile                                    | 35-100        | 35-100        | 35-100        | 35-100        | 35-100        | 35-100        | 35-100        | 35-100        |
| % whose home language is not English/French                        |               |               |               |               |               |               |               |               |
| Mean (SD)                                                          | 1.87 (3.71)   | 1.87 (3.71)   | 1.87 (3.71)   | 1.87 (3.71)   | 1.87 (3.71)   | 1.87 (3.71)   | 1.87 (3.71)   | 1.87 (3.71)   |
| 0-10 <sup>th</sup> percentile                                      | 0-0           | 0-0           | 0-0           | 0-0           | 0-0           | 0-0           | 0-0           | 0-0           |
| Median (IQR)                                                       | 0 (0-2)       | 0 (0-2)       | 0 (0-2)       | 0 (0-2)       | 0 (0-2)       | 0 (0-2)       | 0 (0-2)       | 0 (0-2)       |
| 90-100 <sup>th</sup> percentile                                    | 6-55          | 6-55          | 6-55          | 6-55          | 6-55          | 6-55          | 6-55          | 6-55          |
| % Immigrants arriving in Canada within last... 0-8y (Recent)       |               |               |               |               |               |               |               |               |
| Mean (SD)                                                          | 3.85 (5.16)   | 3.85 (5.16)   | 3.85 (5.16)   | 3.85 (5.16)   | 3.85 (5.16)   | 3.85 (5.16)   | 3.85 (5.16)   | 3.85 (5.16)   |
| 0-10 <sup>th</sup> percentile                                      | 0-0.19        | 0-0.19        | 0-0.19        | 0-0.19        | 0-0.19        | 0-0.19        | 0-0.19        | 0-0.19        |
| Median (IQR)                                                       | 2 (1-5)       | 2 (1-5)       | 2 (1-5)       | 2 (1-5)       | 2 (1-5)       | 2 (1-5)       | 2 (1-5)       | 2 (1-5)       |
| 90-100 <sup>th</sup> percentile                                    | 11-52         | 11-52         | 11-52         | 11-52         | 11-52         | 11-52         | 11-52         | 11-52         |
| 9-16y                                                              |               |               |               |               |               |               |               |               |
| Mean (SD)                                                          | 3.87 (4.80)   | 3.87 (4.80)   | 3.87 (4.80)   | 3.87 (4.80)   | 3.87 (4.80)   | 3.87 (4.80)   | 3.87 (4.80)   | 3.87 (4.80)   |
| 0-10 <sup>th</sup> percentile                                      | 0-0.18        | 0-0.18        | 0-0.18        | 0-0.18        | 0-0.18        | 0-0.18        | 0-0.18        | 0-0.18        |
| Median (IQR)                                                       | 2 (1-6)       | 2 (1-6)       | 2 (1-6)       | 2 (1-6)       | 2 (1-6)       | 2 (1-6)       | 2 (1-6)       | 2 (1-6)       |
| 90-100 <sup>th</sup> percentile                                    | 11-29         | 11-29         | 11-29         | 11-29         | 11-29         | 11-29         | 11-29         | 11-29         |
| 17-27y (Distant)                                                   |               |               |               |               |               |               |               |               |
| Mean (SD)                                                          | 4.29 (4.62)   | 4.29 (4.62)   | 4.29 (4.63)   | 4.29 (4.62)   | 4.29 (4.62)   | 4.29 (4.63)   | 4.29 (4.63)   | 4.29 (4.63)   |
| 0-10 <sup>th</sup> percentile                                      | 0-0.32        | 0-0.32        | 0-0.32        | 0-0.32        | 0-0.32        | 0-0.32        | 0-0.32        | 0-0.32        |
| Median (IQR)                                                       | 2 (1-6)       | 2 (1-6)       | 2 (1-6)       | 2 (1-6)       | 2 (1-6)       | 2 (1-6)       | 2 (1-6)       | 2 (1-6)       |
| 90-100 <sup>th</sup> percentile                                    | 12-29         | 12-29         | 12-29         | 12-29         | 12-29         | 12-29         | 12-29         | 12-29         |
| % Non-immigrants                                                   |               |               |               |               |               |               |               |               |
| Mean (SD)                                                          | 87.99 (13.53) | 87.99 (13.53) | 87.99 (13.54) | 87.99 (13.53) | 87.99 (13.53) | 87.99 (13.54) | 87.99 (13.54) | 87.99 (13.54) |
| 0-10 <sup>th</sup> percentile                                      | 20-66         | 20-66         | 20-66         | 20-66         | 20-66         | 20-66         | 20-66         | 20-66         |
| Median (IQR)                                                       | 94 (82-98)    | 94 (82-98)    | 94 (82-98)    | 94 (82-98)    | 94 (82-98)    | 94 (82-98)    | 94 (82-98)    | 94 (82-98)    |
| 90-100 <sup>th</sup> percentile                                    | 99-100        | 99-100        | 99-100        | 99-100        | 99-100        | 99-100        | 99-100        | 99-100        |
| Income quintile with mean income per quintile, Can \$, No. (%)     |               |               |               |               |               |               |               |               |
| Q1 (44,722)                                                        | 2,964 (15.6)  | 2,964 (15.6)  | 2,964 (15.6)  | 2,964 (15.6)  | 2,964 (15.6)  | 2,964 (15.6)  | 2,964 (15.6)  | 2,964 (15.6)  |
| Q2 (62,080)                                                        | 3,380 (17.8)  | 3,380 (17.8)  | 3,382 (17.8)  | 3,382 (17.8)  | 3,380 (17.8)  | 3,382 (17.9)  | 3,382 (17.8)  | 3,382 (17.8)  |
| Q3 (74,910)                                                        | 3,198 (16.9)  | 3,198 (16.9)  | 3,198 (16.9)  | 3,198 (16.9)  | 3,198 (16.9)  | 3,196 (16.9)  | 3,199 (16.9)  | 3,199 (16.9)  |
| Q4 (88,465)                                                        | 3,254 (17.2)  | 3,254 (17.2)  | 3,253 (17.2)  | 3,253 (17.2)  | 3,254 (17.2)  | 3,253 (17.2)  | 3,253 (17.2)  | 3,253 (17.2)  |
| Q5 (129,777)                                                       | 3,430 (18.1)  | 3,430 (18.1)  | 3,429 (18.1)  | 3,429 (18.1)  | 3,430 (18.1)  | 3,428 (18.1)  | 3,429 (18.1)  | 3,429 (18.1)  |
| Rural                                                              | 2,672 (14.1)  | 2,672 (14.1)  | 2,674 (14.1)  | 2,674 (14.1)  | 2,671 (14.1)  | 2,670 (14.1)  | 2,673 (14.1)  | 2,674 (14.1)  |
| Median No. visits to PCP within 4 years                            |               |               |               |               |               |               |               |               |
| Mean (SD)                                                          | 6.68 (2.07)   | 6.65 (2.07)   | 5.57 (1.71)   | 5.81 (1.72)   | 6.68 (2.06)   | 5.15 (1.69)   | 3.89 (1.29)   | 4.27 (1.42)   |
| 0-10 <sup>th</sup> percentile                                      | 0-4           | 0-4           | 0-4           | 0-4           | 0-4           | 0-3           | 0-2           | 0-3           |
| Median (IQR)                                                       | 6 (5-8)       | 6 (5-8)       | 5 (4-7)       | 6 (5-7)       | 6 (5-8)       | 5 (4-6)       | 4 (3-5)       | 4 (3-5)       |
| 90-100 <sup>th</sup> percentile                                    | 9-68          | 9-68          | 8-19          | 8-23          | 62-68         | 7-26          | 6-26          | 6-25          |
| % of patients rostered (either virtually or via a PEM to a PCP)    |               |               |               |               |               |               |               |               |
| Mean (SD)                                                          | 96.35 (4.37)  | 96.32 (4.40)  | 95.47 (4.39)  | 95.8 (4.32)   | 96.37 (4.36)  | 93.6 (5.51)   | 91.3 (5.97)   | 92.19 (5.53)  |



**Table 1.** Descriptive Statistics of the 8 Screen-eligible cohorts – patient characteristics.

|                                                                                             |             |             |              |              |             |               |              |             |
|---------------------------------------------------------------------------------------------|-------------|-------------|--------------|--------------|-------------|---------------|--------------|-------------|
| 0-10 <sup>th</sup> percentile                                                               | 0-93        | 0-93        | 0-92         | 0-92         | 0-93        | 0-88          | 0-85         | 0-87        |
| Median (IQR)                                                                                | 97 (95-99)  | 97 (95-99)  | 96 (94-98)   | 97 (95-98)   | 97 (95-99)  | 95 (92-97)    | 93 (89-95)   | 93 (90-95)  |
| 90-100 <sup>th</sup> percentile                                                             | 100-100     | 100-100     | 99-100       | 99-100       | 100-100     | 98-100        | 97-100       | 97-100      |
| % of patients virtually rostered to PCP who is not part of a PEM                            |             |             |              |              |             |               |              |             |
| Mean (SD)                                                                                   | 5.39 (5.46) | 5.40 (5.47) | 5.17 (4.64)  | 5.50 (3.91)  | 5.39 (5.40) | 6.18 (5.67)   | 6.16 (5.26)  | 6.14 (5.20) |
| 0-10 <sup>th</sup> percentile                                                               | 0-0         | 0-0         | 0-1          | 0-2          | 0-0         | 0-0           | 0-1          | 0-1         |
| Median (IQR)                                                                                | 4 (2-8)     | 4 (2-8)     | 4 (2-7)      | 4 (2-7)      | 4 (2-8)     | 5 (2-9)       | 5 (2-9)      | 5 (2-9)     |
| 90-100 <sup>th</sup> percentile                                                             | 12-100      | 12-100      | 11-100       | 10-100       | 12-100      | 13-100        | 13-100       | 12-100      |
| % of patients virtually rostered to a PEM PCP                                               |             |             |              |              |             |               |              |             |
| Mean (SD)                                                                                   | 5.06 (4.15) | 5.07 (4.18) | 5.78 (3.73)  | 5.50 (3.90)  | 5.06 (4.16) | 6.34 (4.37)   | 7.40 (4.43)  | 7.09 (4.22) |
| 0-10 <sup>th</sup> percentile                                                               | 0-1         | 0-1         | 0-2          | 0-2          | 0-1         | 0-2           | 0-3          | 0-3         |
| Median (IQR)                                                                                | 5 (3-7)     | 5 (3-7)     | 5 (3-8)      | 5 (3-7)      | 5 (3-7)     | 6 (3-9)       | 7 (4-10)     | 7 (4-9)     |
| 90-100 <sup>th</sup> percentile                                                             | 9-100       | 9-100       | 10-67        | 10-100       | 9-100       | 11-100        | 13-100       | 12-100      |
| % of patients rostered via PEM to PEM PCP                                                   |             |             |              |              |             |               |              |             |
| Mean (SD)                                                                                   | 85.9 (8.89) | 85.9 (8.92) | 84.52 (8.53) | 85.07 (8.64) | 86 (8.86)   | 81.06 (10.07) | 77.8 (10.33) | 79.0 (9.90) |
| 0-10 <sup>th</sup> percentile                                                               | 0-76        | 0-76        | 0-75         | 0-76         | 0-76        | 0-69          | 0-65         | 0-67        |
| Median (IQR)                                                                                | 87 (82-92)  | 87 (82-92)  | 86 (81-90)   | 86 (81-91)   | 87 (82-92)  | 83 (76-88)    | 79 (72-85)   | 80 (74-86)  |
| 90-100 <sup>th</sup> percentile                                                             | 95-100      | 95-100      | 93-100       | 94-100       | 95-100      | 92-100        | 89-100       | 90-100      |
| <b>Overall Median Screening Prevalence summarized over DAs, % (95% Confidence Interval)</b> |             |             |              |              |             |               |              |             |
|                                                                                             | 58.2        | 61.8        | 68.2         | 69.1         | 87.4        | 52.8          | 58.4         | 76.3        |
|                                                                                             | (58.1-58.4) | (61.7-62.0) | (68.0-68.3)  | (69.0-69.3)  | (87.2-87.5) | (52.6-53.0)   | (58.3-58.6)  | (76.1-76.5) |

**Table 2.** Descriptive Statistics of the 8 Screen-eligible cohorts – patients' primary care provider (PCP) characteristics.

|                                                                                                  | Women         |               |               |               |               | Men           |               |               |
|--------------------------------------------------------------------------------------------------|---------------|---------------|---------------|---------------|---------------|---------------|---------------|---------------|
| Characteristic                                                                                   | Colorectal    | Breast        | Cervical      | Glucose       | Cholesterol   | Colorectal    | Glucose       | Cholesterol   |
| No. screen-eligible patients with a primary care provider                                        | 1,853,133     | 1,824,741     | 3,061,665     | 2,496,057     | 1,869,102     | 1,708,973     | 2,211,083     | 2,574,678     |
| No. DAs w/ screen-eligible patients with a primary care provider                                 | 18,941        | 18,941        | 18,947        | 18,945        | 18,940        | 18,933        | 18,943        | 18,946        |
| <b>Screen-eligible patients' primary care provider (PCP) Characteristics summarized over DAs</b> |               |               |               |               |               |               |               |               |
| No. PCPs                                                                                         |               |               |               |               |               |               |               |               |
| Mean (SD)                                                                                        | 60.2 (39.0)   | 59.5 (38.5)   | 91.7 (68.4)   | 76.9 (51.4)   | 60.6 (39.2)   | 56.1 (35.3)   | 70.1 (47.1)   | 78.2 (52.6)   |
| 0-10 <sup>th</sup> percentile                                                                    | 1-29          | 1-29          | 1-39          | 1-35          | 1-29          | 1-28          | 1-33          | 1-35          |
| Median (IQR)                                                                                     | 53 (39-70)    | 52 (38-69)    | 79 (54-108)   | 67 (48-91)    | 53 (39-71)    | 50 (37-66)    | 62 (45-82)    | 70 (50-92)    |
| 90-100 <sup>th</sup> percentile                                                                  | 96-979        | 95-976        | 151-1,751     | 123-1,376     | 97-987        | 88-1,009      | 110-1,358     | 124-1,449     |
| PCP Age                                                                                          |               |               |               |               |               |               |               |               |
| Mean (SD)                                                                                        | 52.86 (2.85)  | 52.86 (2.86)  | 51.66 (2.40)  | 52.30 (2.54)  | 52.86 (2.84)  | 53.61 (2.95)  | 52.97 (2.67)  | 53.01 (2.63)  |
| 0-10 <sup>th</sup> percentile                                                                    | 31-49         | 29-49         | 31-49         | 31-49         | 31-49         | 33-50         | 33-50         | 35-50         |
| Median (IQR)                                                                                     | 53 (51-55)    | 53 (51-53)    | 52 (52-53)    | 52 (51-54)    | 53 (51-55)    | 54 (52-56)    | 53 (51-55)    | 53 (51-55)    |
| 90-100 <sup>th</sup> percentile                                                                  | 56-68         | 56-68         | 55-68         | 55-70         | 56-68         | 57-80         | 56-80         | 56-80         |
| % of female PCPs                                                                                 |               |               |               |               |               |               |               |               |
| Mean (SD)                                                                                        | 39.84 (11.93) | 39.79 (11.98) | 43.31 (11.55) | 41.89 (11.79) | 39.87 (11.91) | 23.74 (8.46)  | 25.28 (8.32)  | 25.42 (8.06)  |
| 0-10 <sup>th</sup> percentile                                                                    | 0-25          | 0-25          | 0-29          | 0-27          | 0-25          | 0-14          | 0-15          | 0-16          |
| Median (IQR)                                                                                     | 39 (31-48)    | 39 (31-48)    | 43 (35-52)    | 41 (33-50)    | 39 (34-48)    | 23 (18-29)    | 25 (20-31)    | 25 (20-31)    |
| 90-100 <sup>th</sup> percentile                                                                  | 56-100        | 56-100        | 59-100        | 57-100        | 56-100        | 35-100        | 36-100        | 36-100        |
| % of International Medical Graduates, median ( IQR)                                              |               |               |               |               |               |               |               |               |
| Mean (SD)                                                                                        | 19.49 (11.19) | 19.51 (11.20) | 19.64 (10.57) | 19.24 (10.62) | 19.46 (11.15) | 19.42 (11.30) | 19.34 (10.86) | 19.51 (10.74) |
| 0-10 <sup>th</sup> percentile                                                                    | 0-6           | 0-6           | 0-7           | 0-6           | 0-6           | 0-6           | 0-6           | 0-7           |
| Median (IQR)                                                                                     | 19 (11-27)    | 19 (11-27)    | 19 (11-27)    | 19 (11-26)    | 19 (11-27)    | 18 (11-27)    | 18 (11-26)    | 18 (11-26)    |
| 90-100 <sup>th</sup> percentile                                                                  | 34-100        | 34-100        | 34-100        | 33-100        | 34-100        | 35-100        | 34-100        | 34-100        |
| % in PEM                                                                                         |               |               |               |               |               |               |               |               |
| Mean (SD)                                                                                        | 93.77 (5.28)  | 93.78 (5.29)  | 93.69 (4.53)  | 93.76 (4.75)  | 93.78 (5.22)  | 92.60 (5.73)  | 92.28 (5.47)  | 92.31 (5.25)  |
| 0-10 <sup>th</sup> percentile                                                                    | 0-88          | 0-88          | 0-89          | 0-88          | 0-88          | 0-86          | 0-86          | 0-86          |
| Median (IQR)                                                                                     | 94 (91-97)    | 95 (91-97)    | 94 (91-97)    | 95 (91-97)    | 93 (90-97)    | 93 (90-97)    | 93 (89-96)    | 93 (89-96)    |
| 90-100 <sup>th</sup> percentile                                                                  | 100-100       | 100-100       | 99-100        | 99-100        | 100-100       | 100-100       | 98-100        | 98-100        |
| Median No. Yrs since Graduation,                                                                 |               |               |               |               |               |               |               |               |
| Mean (SD)                                                                                        | 27.25 (2.98)  | 27.24 (2.99)  | 26.03 (2.45)  | 26.66 (2.63)  | 27.24 (2.97)  | 28.00 (3.11)  | 27.33 (2.79)  | 27.39 (2.74)  |
| 0-10 <sup>th</sup> percentile                                                                    | 5-24          | 3-24          | 3-23          | 5-24          | 5-24          | 3-24          | 5-24          | 7-24          |
| Median (IQR)                                                                                     | 27 (25-29)    | 27 (25-29)    | 26 (25-28)    | 27 (25-28)    | 27 (25-29)    | 28 (26-30)    | 28 (26-29)    | 27 (25-28)    |
| 90-100 <sup>th</sup> percentile                                                                  | 31-44         | 31-44         | 29-42         | 30-43         | 31-44         | 32-49         | 31-49         | 31-49         |

**Figure 1. Median Screening Prevalence for DAs stratified by Cohort and Resident characteristics.**

Y-axis: Median screening prevalence (%). X-axis: DAs stratified by cohort or resident characteristic specified in graph title. Prevalence ratios (PR) are reported as  $\frac{\text{Median screening prevalence of Highest stratum}}{\text{Median screening prevalence of Lowest stratum}}$ . ALL= Median screening prevalence for all tests among patients eligible for all tests. ANY= Median screening prevalence for any test among those eligible for all tests. CRC = Colorectal, BRC = Breast, CXC = Cervical, GLU = Glucose, CHO = Cholesterol.

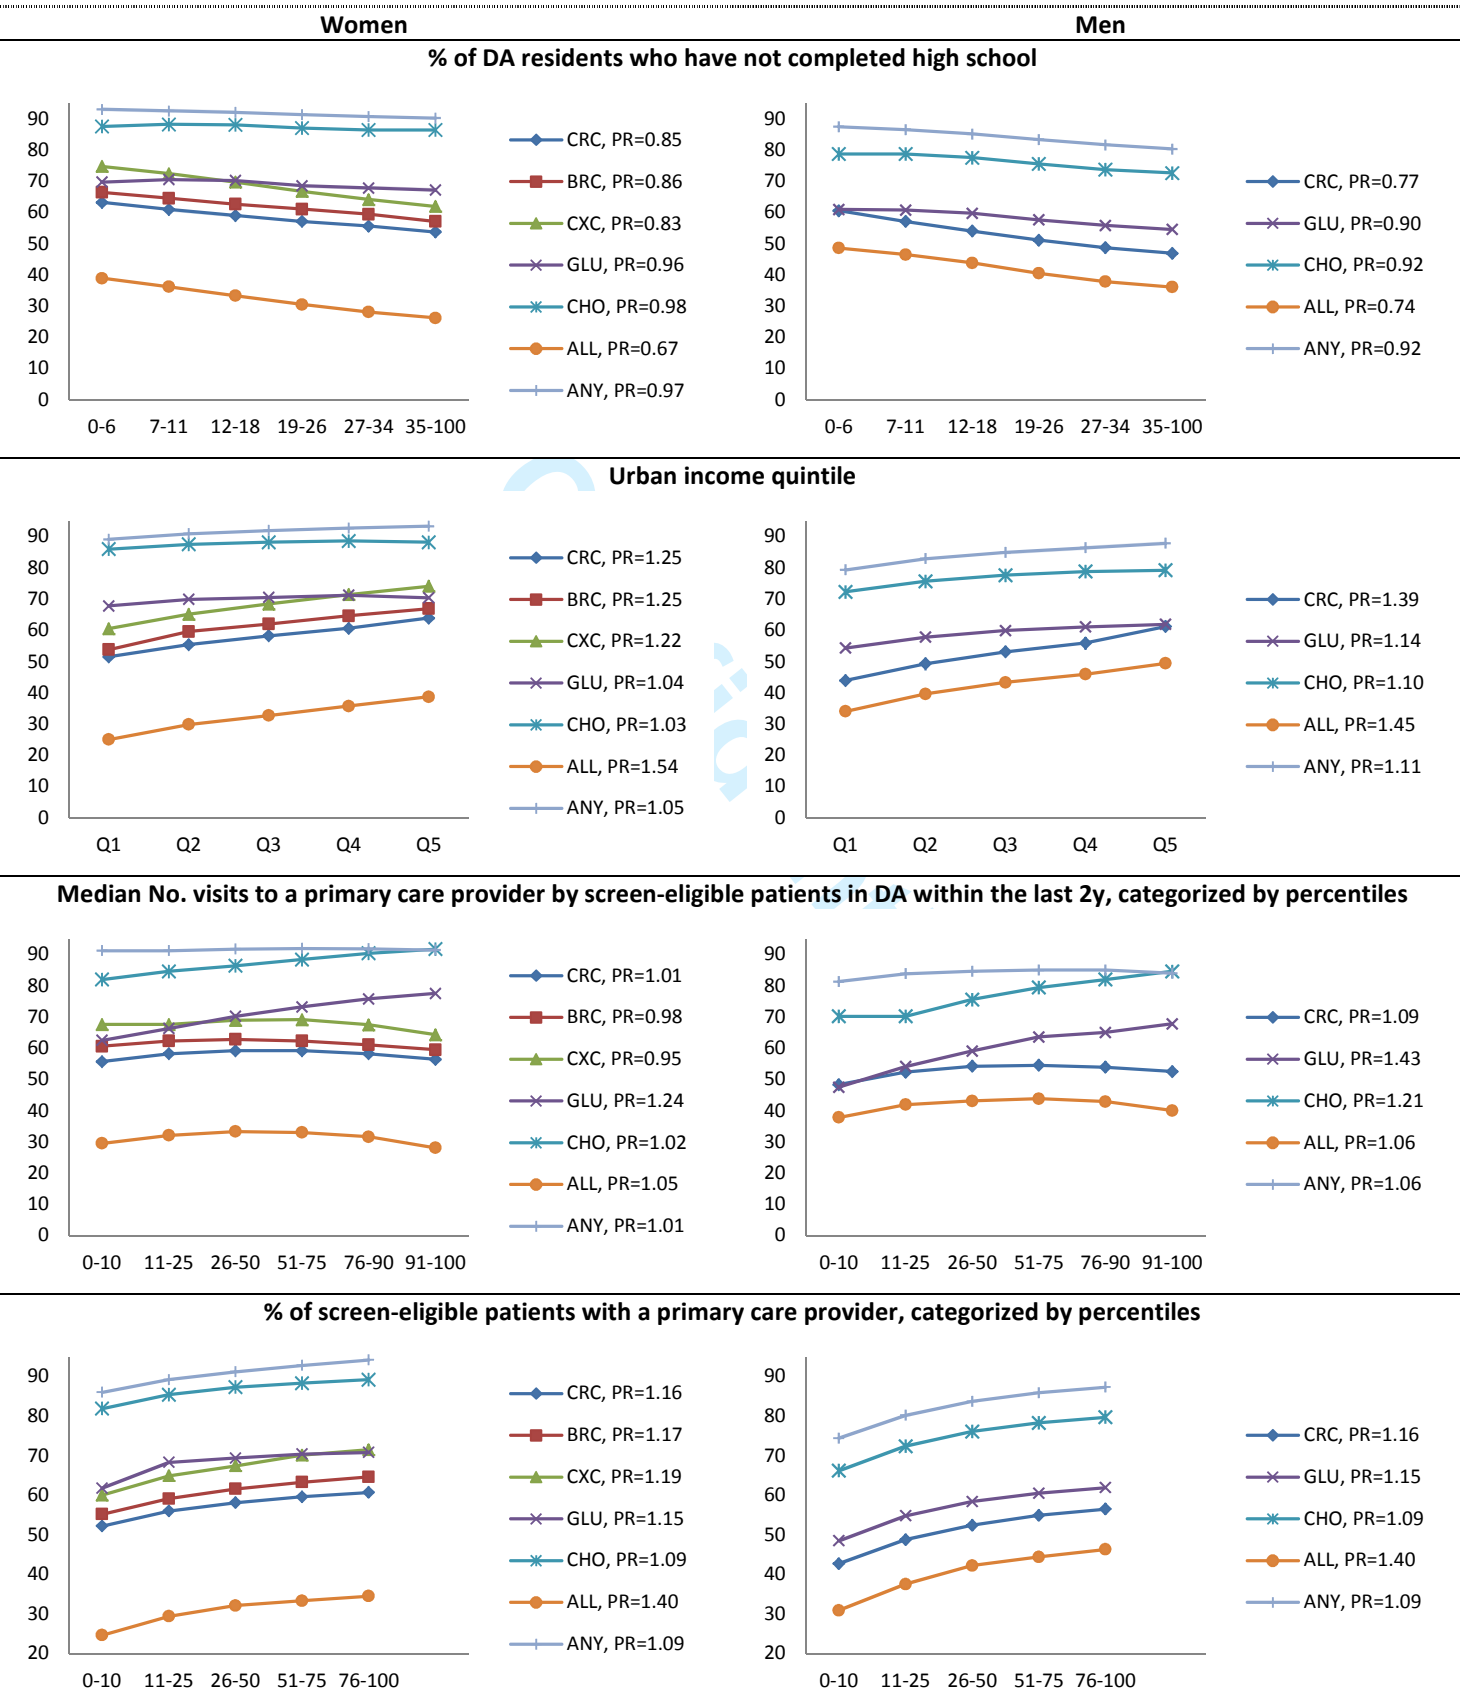

Figure 2a. For patients with an identifiable physician, adjusted odds ratios for being up to date on each screening test. The age reference group is indicated with R. All 95% confidence intervals do not overlap with 1.00 except those indicated with \*. Odds ratios also adjusted for patient co-morbidities (not shown).

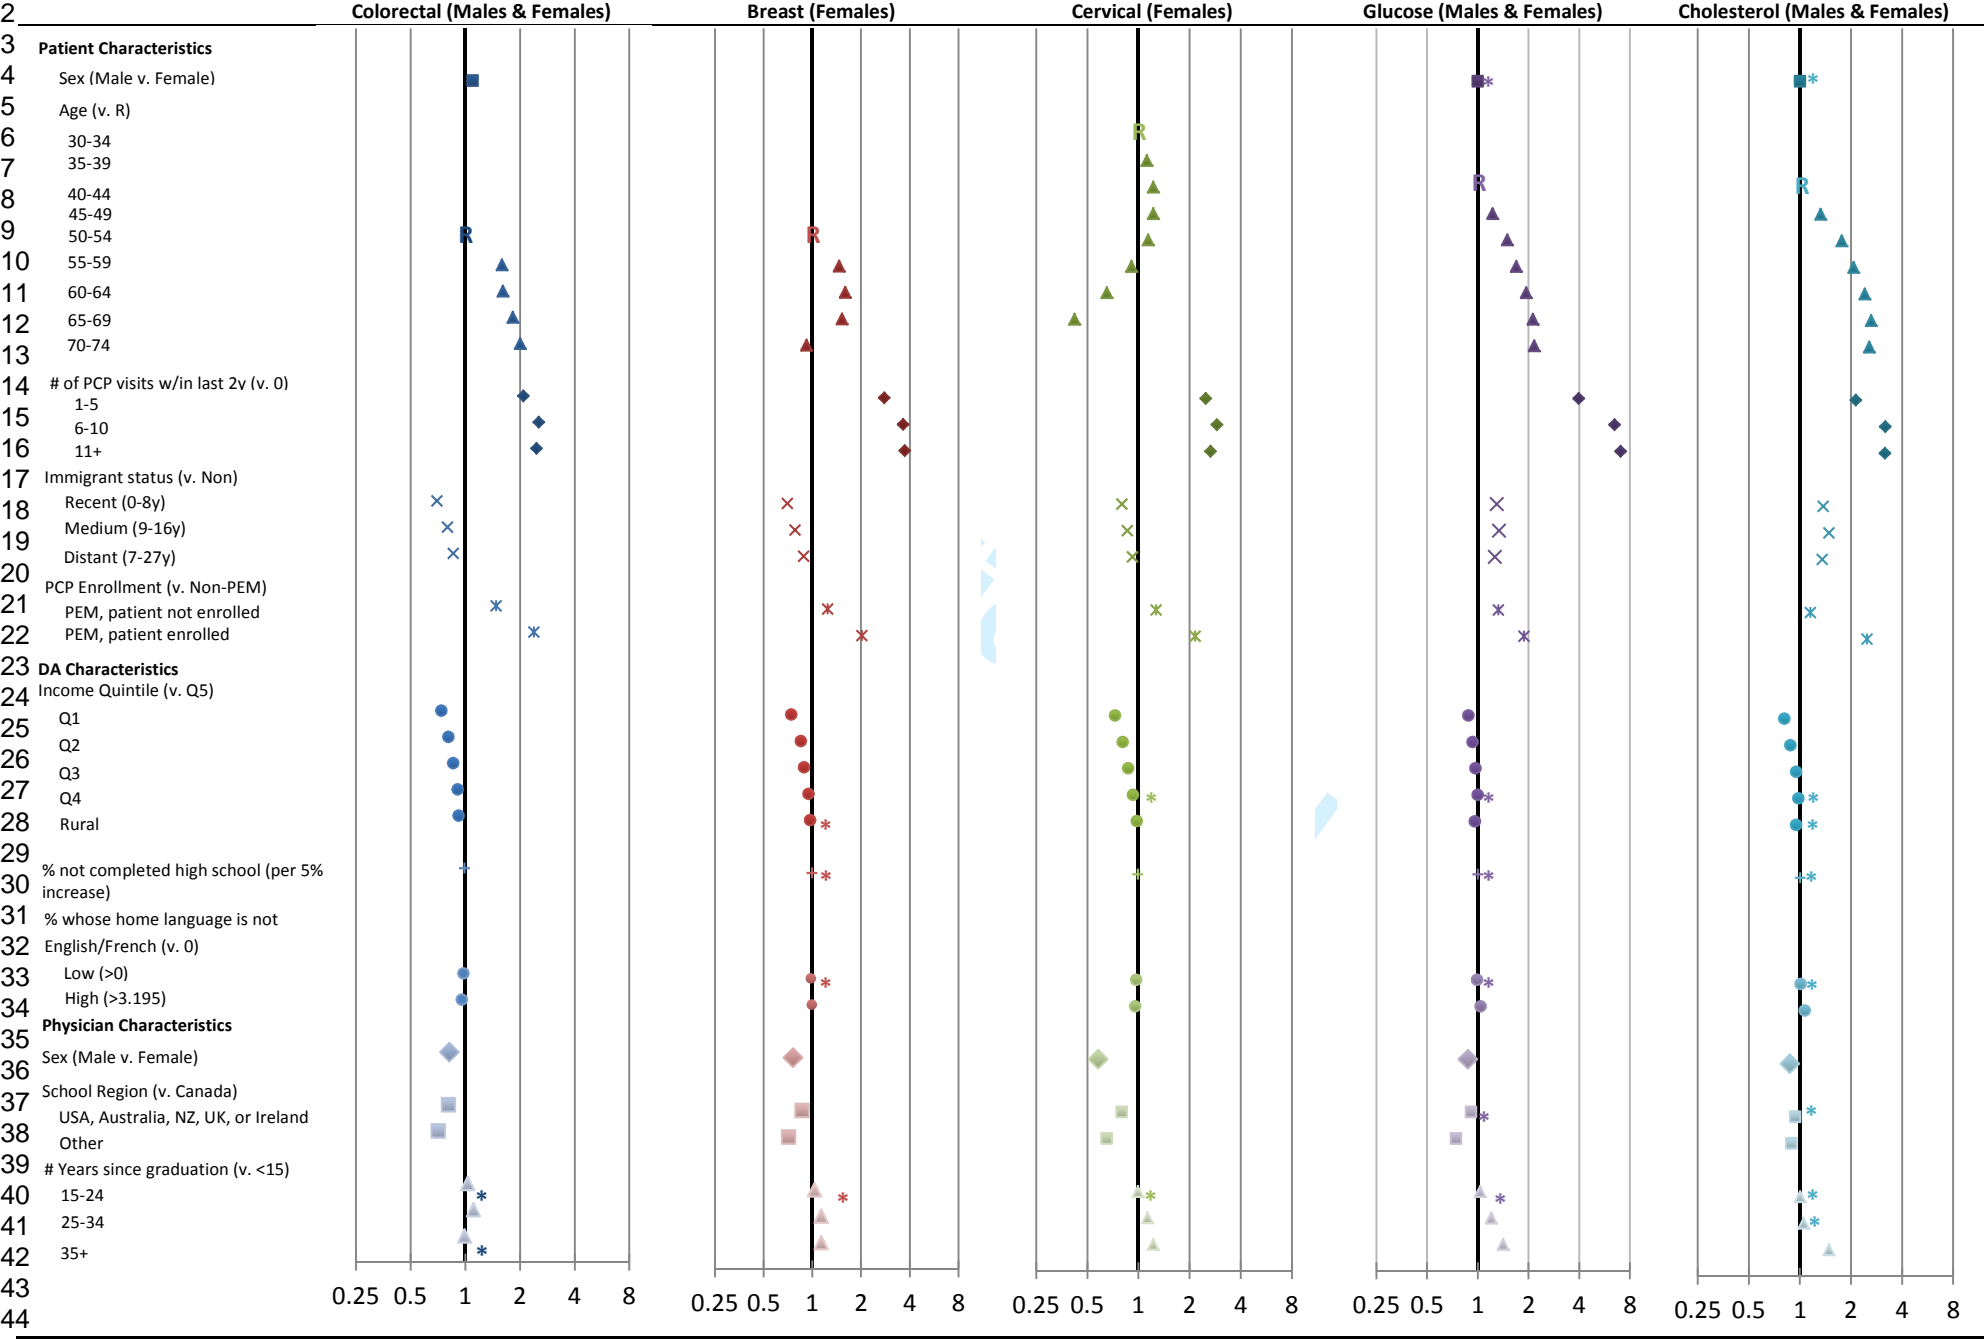

**Figure 2b. For patients without an identifiable physician, adjusted odds ratios for being up to date on each screening test.** The age reference group is indicated with R. All 95% confidence intervals do not overlap with 1.00 except those indicated with \*. Odds ratios also adjusted for patient co-morbidities (not shown).

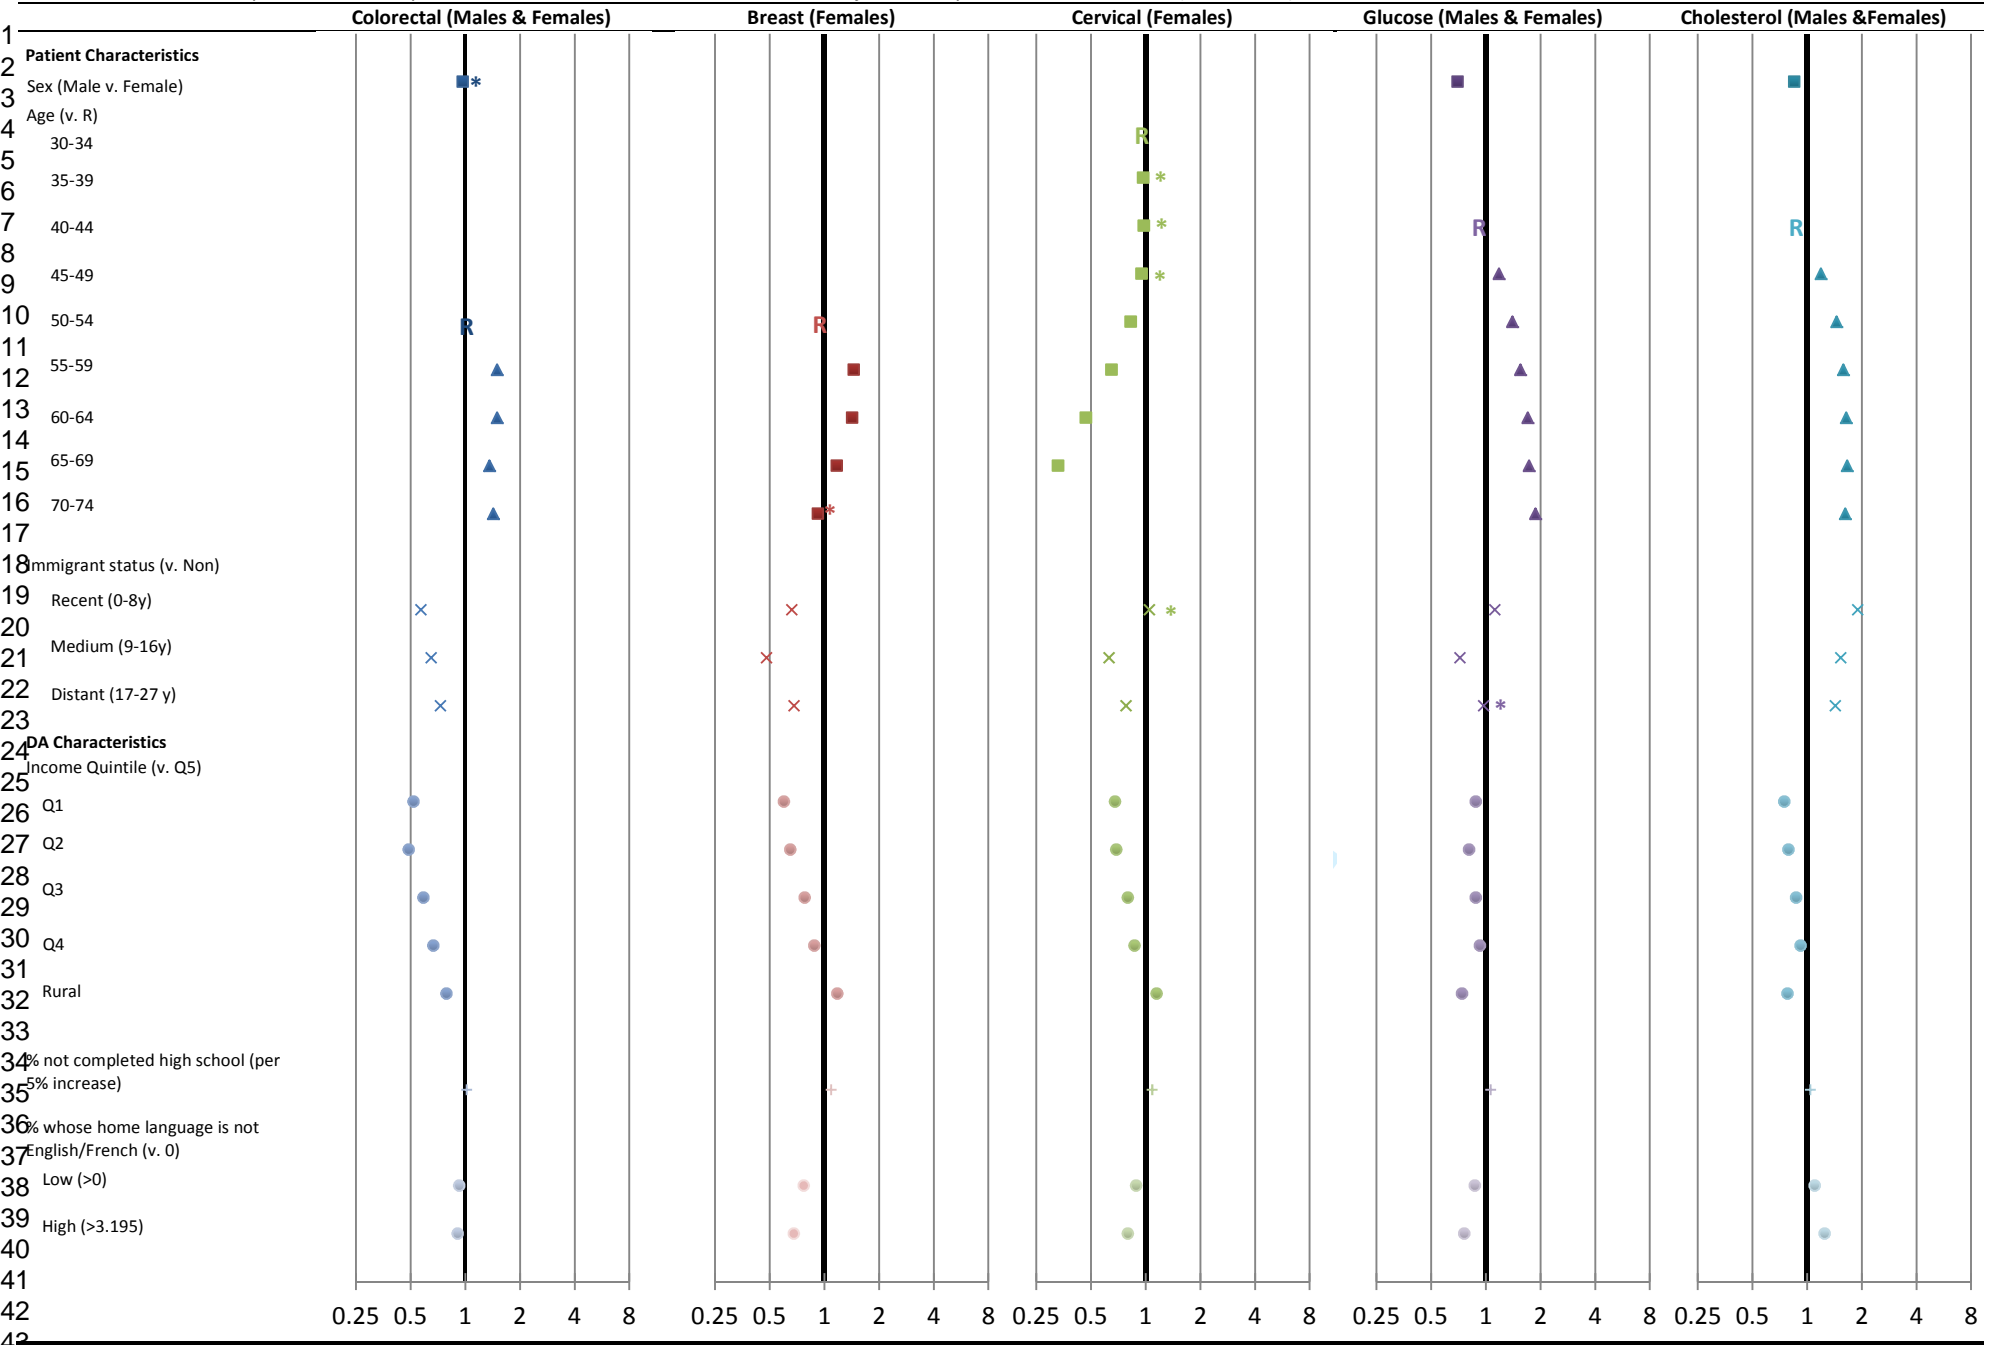

**Supplementary Table 1.** Descriptive statistics of the screen-eligible cohorts, stratified by screening status.

|                                                        | Received Colorectal Screening? (50-74) |                     |                     | Received Breast Screening? (50-74 y) |                      |                      | Received Cervical Screening? (30-69 y) |                      |                      | Received Glucose Screening? (40-74 y) |                     |                     | Received Cholesterol Screening? (50-74) |                     |                     |
|--------------------------------------------------------|----------------------------------------|---------------------|---------------------|--------------------------------------|----------------------|----------------------|----------------------------------------|----------------------|----------------------|---------------------------------------|---------------------|---------------------|-----------------------------------------|---------------------|---------------------|
|                                                        | No                                     | Yes                 | Total               | No                                   | Yes                  | Total                | No                                     | Yes                  | Total                | No                                    | Yes                 | Total               | No                                      | Yes                 | Total               |
|                                                        | 1,648,064<br>(44 %)                    | 2,090,886<br>(56%)  | 3,738,950           | 724,113<br>(38%)                     | 1,166,216<br>(62%)   | 1,890,329            | 1,013,274<br>(32%)                     | 2,185,923<br>(68%)   | 3,199,197            | 1,825,081<br>(36%)                    | 3,184,421<br>(64%)  | 5,009,502           | 960,713<br>(20%)                        | 3,757,077<br>(80%)  | 4,717,790           |
| <b>Baseline Characteristics</b>                        |                                        |                     |                     |                                      |                      |                      |                                        |                      |                      |                                       |                     |                     |                                         |                     |                     |
| <b>Sex, N (%)</b>                                      |                                        |                     |                     |                                      |                      |                      |                                        |                      |                      |                                       |                     |                     |                                         |                     |                     |
| F                                                      | 796,820<br>(48.3)                      | 1,122,226<br>(53.7) | 1,919,046<br>(51.3) | 724,113<br>(100.0)                   | 1,166,216<br>(100.0) | 1,890,329<br>(100.0) | 1,013,274<br>(100.0)                   | 2,185,923<br>(100.0) | 3,199,197<br>(100.0) | 814,688<br>(44.6)                     | 1,784,071<br>(56.0) | 2,598,759<br>(51.9) | 276,473<br>(28.8)                       | 1,658,748<br>(44.1) | 1,935,221<br>(41.0) |
| M                                                      | 851,244<br>(51.7)                      | 968,660<br>(46.3)   | 1,819,904<br>(48.7) | 0 (0)                                | 0 (0)                | 0 (0)                |                                        |                      |                      | 1,010,393<br>(55.4)                   | 1,400,350<br>(44.0) | 2,410,743<br>(48.1) | 684,240<br>(71.2)                       | 2,098,329<br>(55.9) | 2,782,569<br>(59.0) |
| <b>Age (years)</b>                                     |                                        |                     |                     |                                      |                      |                      |                                        |                      |                      |                                       |                     |                     |                                         |                     |                     |
| Median (IQR)                                           | 58 (53-64)                             | 61 (55-67)          | 59 (54-66)          | 59(53-66)                            | 60 (55-66)           | 59 (54-66)           | 50 (41-60)                             | 47 (38-56)           | 48 (39-57)           | 50(45-58)                             | 54 (48-63)          | 53 (46-61)          | 52 (46-59)                              | 57 (51-65)          | 56(50-64)           |
| Range                                                  | 50-75                                  | 50-75               | 50-75               | 50-75                                | 50-75                | 50-75                | 30-70                                  | 30-70                | 30-70                | 40-75                                 | 40-75               | 40-75               | 40-75                                   | 40-75               | 40-75               |
| <b>Immigrant status, N (%)</b>                         |                                        |                     |                     |                                      |                      |                      |                                        |                      |                      |                                       |                     |                     |                                         |                     |                     |
| Recent immigrant (<8y)                                 | 51,456<br>(3.1)                        | 35,893<br>(1.7)     | 87,349<br>(2.3)     | 24,833<br>(3.4)                      | 20,803<br>(1.8)      | 45,636<br>(2.4)      | 66,905<br>(6.6)                        | 115,559<br>(5.3)     | 182,464<br>(5.7)     | 57,961<br>(3.2)                       | 116,150<br>(3.6)    | 174,111<br>(3.5)    | 24,145<br>(2.5)                         | 115,924<br>(3.1)    | 140,069<br>(3.0)    |
| Non-distant immigrant (<16y)                           | 81,546<br>(4.9)                        | 70,889<br>(3.4)     | 152,435<br>(4.1)    | 37,194<br>(5.1)                      | 38,716<br>(3.3)      | 75,910<br>(4.0)      | 83,236<br>(8.2)                        | 150,395<br>(6.9)     | 233,631<br>(7.3)     | 92,460<br>(5.1)                       | 196,841<br>(6.2)    | 289,301<br>(5.8)    | 39,127<br>(4.1)                         | 202,761<br>(5.4)    | 241,888<br>(5.1)    |
| Distant immigrant (<28 y)                              | 126,833<br>(7.7)                       | 131,102<br>(6.3)    | 257,935<br>(6.9)    | 54,435<br>(7.5)                      | 72,973<br>(6.3)      | 127,408<br>(6.7)     | 79,189<br>(7.8)                        | 159,592<br>(7.3)     | 238,781<br>(7.5)     | 102,751<br>(5.6)                      | 257,267<br>(8.1)    | 360,018<br>(7.2)    | 47,218<br>(4.9)                         | 294,820<br>(7.8)    | 342,038<br>(7.2)    |
| Non-immigrant (28+ years)                              | 1,388,229<br>(84.2)                    | 1,853,002<br>(88.6) | 3,241,231<br>(86.7) | 607,651<br>(83.9)                    | 1,033,724<br>(88.6)  | 1,641,375<br>(86.8)  | 783,944<br>(77.4)                      | 1,760,377<br>(80.5)  | 2,544,321<br>(79.5)  | 1,571,909<br>(86.1)                   | 2,614,163<br>(82.1) | 4,186,072<br>(83.6) | 850,223<br>(88.5)                       | 3,143,572<br>(83.7) | 3,993,795<br>(84.7) |
| <b>Total # of PCP visits within the last 2y, N (%)</b> |                                        |                     |                     |                                      |                      |                      |                                        |                      |                      |                                       |                     |                     |                                         |                     |                     |
| Median (IQR)                                           | 4 (1-9)                                | 7 (4-12)            | 6 (3-11)            | 5 (1-10)                             | 7 (4-12)             | 7 (3-12)             | 4 (1-9)                                | 6 (3-11)             | 6 (3-10)             | 2 (0-5)                               | 7 (4-11)            | 5 (2-9)             | 1 (0-4)                                 | 6 (3-11)            | 5 (2-10)            |
| Range                                                  | 0-402                                  | 0-429               | 0-429               | 0-402                                | 0-401                | 0-402                | 0-286                                  | 0-402                | 0-402                | 0-354                                 | 0-616               | 0-616               | 0-249                                   | 0-616               | 0-616               |
| 0                                                      | 308,392<br>(18.7)                      | 74,929<br>(3.6)     | 383,321<br>(10.3)   | 121,502<br>(16.8)                    | 30,492<br>(2.6)      | 151,994<br>(8.0)     | 234,740<br>(23.2)                      | 79,349<br>(3.6)      | 314,089<br>(9.8)     | 567,847<br>(31.1)                     | 76,115<br>(2.4)     | 643,962<br>(12.9)   | 359,093<br>(37.4)                       | 221,033<br>(5.9)    | 580,126<br>(12.3)   |
| 1 to 5                                                 | 670,075<br>(40.7)                      | 723,798<br>(34.6)   | 1,393,873<br>(37.3) | 268,084<br>(37.0)                    | 382,320<br>(32.8)    | 650,404<br>(34.4)    | 387,042<br>(38.2)                      | 853,397<br>(39.0)    | 1,240,439<br>(38.8)  | 866,643<br>(47.5)                     | 1,229,603<br>(38.6) | 2,096,246<br>(41.8) | 419,448<br>(43.7)                       | 1,458,459<br>(38.8) | 1,877,907<br>(39.8) |
| 6 to 10                                                | 353,505<br>(21.4)                      | 649,145<br>(31.0)   | 1,002,650<br>(26.8) | 164,027<br>(22.7)                    | 373,162<br>(32.0)    | 537,189<br>(28.4)    | 199,920<br>(19.7)                      | 666,301<br>(30.5)    | 866,221<br>(27.1)    | 247,174<br>(13.5)                     | 999,708<br>(31.4)   | 1,246,882<br>(24.9) | 109,898<br>(11.4)                       | 1,074,553<br>(28.6) | 1,184,451<br>(25.1) |
| 11+                                                    | 316,092<br>(19.2)                      | 643,014<br>(30.8)   | 959,106<br>(25.7)   | 170,500<br>(23.5)                    | 380,242<br>(32.6)    | 550,742<br>(29.1)    | 191,572<br>(18.9)                      | 586,876<br>(26.8)    | 778,448<br>(24.3)    | 143,417<br>(7.9)                      | 878,995<br>(27.6)   | 1,022,412<br>(20.4) | 72,274<br>(7.5)                         | 1,003,032<br>(26.7) | 1,075,306<br>(22.8) |
| <b>DA-level Characteristics</b>                        |                                        |                     |                     |                                      |                      |                      |                                        |                      |                      |                                       |                     |                     |                                         |                     |                     |
| <b>Neighbourhood Income Quintile, N (%)</b>            |                                        |                     |                     |                                      |                      |                      |                                        |                      |                      |                                       |                     |                     |                                         |                     |                     |
| Q1                                                     | 284,829<br>(17.3)                      | 269,525<br>(12.9)   | 554,354<br>(14.8)   | 130,827<br>(18.1)                    | 153,469<br>(13.2)    | 284,296<br>(15.0)    | 201,600<br>(19.9)                      | 307,327<br>(14.1)    | 508,927<br>(15.9)    | 276,992<br>(15.2)                     | 455,433<br>(14.3)   | 732,425<br>(14.6)   | 153,758<br>(16.0)                       | 559,022<br>(14.9)   | 712,780<br>(15.1)   |
| Q2                                                     | 290,617<br>(17.6)                      | 328,490<br>(15.7)   | 619,107<br>(16.6)   | 129,015<br>(17.8)                    | 188,501<br>(16.2)    | 317,516<br>(16.8)    | 189,908<br>(18.7)                      | 356,710<br>(16.3)    | 546,618<br>(17.1)    | 288,885<br>(15.8)                     | 530,100<br>(16.6)   | 818,985<br>(16.3)   | 149,845<br>(15.6)                       | 636,169<br>(16.9)   | 786,014<br>(16.7)   |
| Q3                                                     | 280,951<br>(17.0)                      | 354,645<br>(17.0)   | 635,596<br>(17.0)   | 123,041<br>(17.0)                    | 200,065<br>(17.2)    | 323,106<br>(17.1)    | 178,092<br>(17.6)                      | 396,262<br>(18.1)    | 574,354<br>(18.0)    | 294,826<br>(16.2)                     | 572,400<br>(18.0)   | 867,226<br>(17.3)   | 145,737<br>(15.2)                       | 667,274<br>(17.8)   | 813,011<br>(17.2)   |
| Q4                                                     | 285,349<br>(17.3)                      | 402,376<br>(19.2)   | 687,725<br>(18.4)   | 123,081<br>(17.0)                    | 224,195<br>(19.2)    | 347,276<br>(18.4)    | 172,267<br>(17.0)                      | 446,630<br>(20.4)    | 618,897<br>(19.3)    | 317,855<br>(17.4)                     | 638,959<br>(20.1)   | 956,814<br>(19.1)   | 151,618<br>(15.8)                       | 728,732<br>(19.4)   | 880,350<br>(18.7)   |
| Q5                                                     | 270,225<br>(16.4)                      | 452,399<br>(21.6)   | 722,624<br>(19.3)   | 120,145<br>(16.6)                    | 242,365<br>(20.8)    | 362,510<br>(19.2)    | 155,412<br>(15.3)                      | 443,353<br>(20.3)    | 598,765<br>(18.7)    | 334,469<br>(18.3)                     | 653,147<br>(20.5)   | 987,616<br>(19.7)   | 157,679<br>(16.4)                       | 742,736<br>(19.8)   | 900,415<br>(19.1)   |
| Rural                                                  | 233,276<br>(14.2)                      | 280,317<br>(13.4)   | 513,593<br>(13.7)   | 96,789<br>(13.4)                     | 156,038<br>(13.4)    | 252,827<br>(13.4)    | 113,920<br>(11.2)                      | 231,822<br>(10.6)    | 345,742<br>(10.8)    | 308,747<br>(16.9)                     | 329,796<br>(10.4)   | 638,543<br>(12.7)   | 200,006<br>(20.8)                       | 417,384<br>(11.1)   | 617,390<br>(13.1)   |
| Unknown                                                | 2,817 (0.2)                            | 3,134 (0.1)         | 5,951 (0.2)         | 1,215                                | 1,583 (0.1)          | 2,798 (0.1)          | 2,075 (0.2)                            | 3,819 (0.2)          | 5,894 (0.2)          | 3,307 (0.2)                           | 4,586 (0.1)         | 7,893 (0.2)         | 2,070                                   | 5,760 (0.2)         | 7,830 (0.2)         |

**Supplementary Table 1.** Descriptive statistics of the screen-eligible cohorts, stratified by screening status.

|                                                                    | Received Colorectal Screening? (50-74) |                       |                        | Received Breast Screening? (50-74 y) |                        |                        | Received Cervical Screening? (30-69 y) |                       |                       | Received Glucose Screening? (40-74 y) |                       |                       | Received Cholesterol Screening? (50-74) |                        |                        |
|--------------------------------------------------------------------|----------------------------------------|-----------------------|------------------------|--------------------------------------|------------------------|------------------------|----------------------------------------|-----------------------|-----------------------|---------------------------------------|-----------------------|-----------------------|-----------------------------------------|------------------------|------------------------|
|                                                                    | No                                     | Yes                   | Total                  | No                                   | Yes                    | Total                  | No                                     | Yes                   | Total                 | No                                    | Yes                   | Total                 | No                                      | Yes                    | Total                  |
|                                                                    | 1,648,064<br>(44 %)                    | 2,090,886<br>(56%)    | 3,738,950              | 724,113<br>(38%)                     | 1,166,216<br>(62%)     | 1,890,329              | 1,013,274<br>(32%)                     | 2,185,923<br>(68%)    | 3,199,197             | 1,825,081<br>(36%)                    | 3,184,421<br>(64%)    | 5,009,502             | 960,713<br>(20%)                        | 3,757,077<br>(80%)     | 4,717,790              |
| <b>% of DA who have not completed high school</b>                  |                                        |                       |                        | (0.2)                                |                        |                        |                                        |                       |                       |                                       |                       |                       | (0.2)                                   |                        |                        |
| Median (IQR)                                                       | 17.98<br>(11.02-25.81)                 | 16.44<br>(9.80-24.29) | 17.10<br>(10.33-25.00) | 17.89<br>(10.92-25.71)               | 16.67<br>(10.00-24.44) | 17.07<br>(10.31-25.00) | 17.54<br>(10.66-25.38)                 | 15.58<br>(9.23-23.25) | 16.18<br>(9.68-23.88) | 17.33<br>(10.28-25.37)                | 16.09<br>(9.65-23.75) | 16.51<br>(9.88-24.32) | 18.33<br>(10.98-26.67)                  | 16.63<br>(10.00-24.29) | 16.91<br>(10.17-24.71) |
| Range                                                              | 0-100                                  | 0-100                 | 0-100                  | 0-100                                | 0-100                  | 0-100                  | 0-100                                  | 0-100                 | 0-100                 | 0-100                                 | 0-100                 | 0-100                 | 0-100                                   | 0-100                  | 0-100                  |
| <b>% of DA whose home language is not English or French, N (%)</b> |                                        |                       |                        |                                      |                        |                        |                                        |                       |                       |                                       |                       |                       |                                         |                        |                        |
| Median (IQR)                                                       | 0.00 (0.00-2.82)                       | 0.00 (0.00-2.52)      | 0.00 (0.00-2.63)       | 0.00 (0.00-2.90)                     | 0.00 (0.00-2.52)       | 0.00 (0.00-2.65)       | 0.64 (0.00-3.41)                       | 0.00 (0.00-2.97)      | 0.00 (0.00-3.09)      | 0.00 (0.00-2.25)                      | 0.00 (0.00-2.97)      | 0.00 (0.00-2.68)      | 0.00 (0.00-2.11)                        | 0.00 (0.00-2.94)       | 0.00 (0.00-2.74)       |
| Range                                                              | 0.00-54.81                             | 0.00-54.81            | 0.00-54.81             | 0.00-54.81                           | 0.00-54.81             | 0.00-54.81             | 0.00-54.81                             | 0.00-54.81            | 0.00-54.81            | 0.00-54.81                            | 0.00-54.81            | 0.00-54.81            | 0.00-54.81                              | 0.00-54.81             | 0.00-54.81             |
| <b>Physician-level Characteristics</b>                             |                                        |                       |                        |                                      |                        |                        |                                        |                       |                       |                                       |                       |                       |                                         |                        |                        |
| <b>Patient rostered to a physician?, N (%)</b>                     |                                        |                       |                        |                                      |                        |                        |                                        |                       |                       |                                       |                       |                       |                                         |                        |                        |
| No                                                                 | 155,215<br>(9.4)                       | 21,629<br>(1.0)       | 176,844<br>(4.7)       | 57,914<br>(8.0)                      | 7,674 (0.7)            | 65,588<br>(3.5)        | 118,103<br>(11.7)                      | 19,429<br>(0.9)       | 137,532<br>(4.3)      | 276,931<br>(15.2)                     | 25,431<br>(0.8)       | 302,362<br>(6.0)      | 209,729<br>(21.8)                       | 64,281<br>(1.7)        | 274,010<br>(5.8)       |
| Yes, to a Non-PEM Physician                                        | 124,404<br>(7.5)                       | 90,793<br>(4.3)       | 215,197<br>(5.8)       | 49,434<br>(6.8)                      | 52,152<br>(4.5)        | 101,586<br>(5.4)       | 73,733<br>(7.3)                        | 98,509<br>(4.5)       | 172,242<br>(5.4)      | 102,145<br>(5.6)                      | 183,791<br>(5.8)      | 285,936<br>(5.7)      | 61,131<br>(6.4)                         | 216,074<br>(5.8)       | 277,205<br>(5.9)       |
| Yes, to a PEM physician, but not enrolled in a model               | 124,846<br>(7.6)                       | 87,793<br>(4.2)       | 212,639<br>(5.7)       | 50,474<br>(7.0)                      | 44,853<br>(3.8)        | 95,327<br>(5.0)        | 82,562<br>(8.1)                        | 107,276<br>(4.9)      | 189,838<br>(5.9)      | 142,701<br>(7.8)                      | 181,656<br>(5.7)      | 324,357<br>(6.5)      | 89,349<br>(9.3)                         | 209,081<br>(5.6)       | 298,430<br>(6.3)       |
| Yes, to a PEM physician via CAPE                                   | 1,243,599<br>(75.5)                    | 1,890,671<br>(90.4)   | 3,134,270<br>(83.8)    | 566,291<br>(78.2)                    | 1,061,537<br>(91.0)    | 1,627,828<br>(86.1)    | 738,876<br>(72.9)                      | 1,960,709<br>(89.7)   | 2,699,585<br>(84.4)   | 1,303,304<br>(71.4)                   | 2,793,543<br>(87.7)   | 4,096,847<br>(81.8)   | 600,504<br>(62.5)                       | 3,267,641<br>(87.0)    | 3,868,145<br>(82.0)    |
| <b>Age, N (%)</b>                                                  |                                        |                       |                        |                                      |                        |                        |                                        |                       |                       |                                       |                       |                       |                                         |                        |                        |
| Patient not rostered to a physician/Unknown                        | 165,060<br>(10.0)                      | 33,105<br>(1.6)       | 198,165<br>(5.3)       | 62,341<br>(8.6)                      | 14,157<br>(1.2)        | 76,498<br>(4.0)        | 124,144<br>(12.3)                      | 30,533<br>(1.4)       | 154,677<br>(4.8)      | 288,003<br>(15.8)                     | 42,036<br>(1.3)       | 330,039<br>(6.6)      | 215,799<br>(22.5)                       | 84,437<br>(2.2)        | 300,236<br>(6.4)       |
| <=41y                                                              | 213,161<br>(12.9)                      | 328,954<br>(15.7)     | 542,115<br>(14.5)      | 100,342<br>(13.9)                    | 190,507<br>(16.3)      | 290,849<br>(15.4)      | 148,960<br>(14.7)                      | 430,583<br>(19.7)     | 579,543<br>(18.1)     | 254,739<br>(14.0)                     | 518,786<br>(16.3)     | 773,525<br>(15.4)     | 120,470<br>(12.5)                       | 577,200<br>(15.4)      | 697,670<br>(14.8)      |
| 42=50y                                                             | 353,191<br>(21.4)                      | 525,725<br>(25.1)     | 878,916<br>(23.5)      | 161,575<br>(22.3)                    | 295,700<br>(25.4)      | 457,275<br>(24.2)      | 226,413<br>(22.3)                      | 610,870<br>(27.9)     | 837,283<br>(26.2)     | 399,331<br>(21.9)                     | 826,507<br>(26.0)     | 1,225,838<br>(24.5)   | 187,433<br>(19.5)                       | 940,440<br>(25.0)      | 1,127,873<br>(23.9)    |
| 51-58y                                                             | 400,549<br>(24.3)                      | 581,860<br>(27.8)     | 982,409<br>(26.3)      | 180,833<br>(25.0)                    | 331,000<br>(28.4)      | 511,833<br>(27.1)      | 235,794<br>(23.3)                      | 597,147<br>(27.3)     | 832,941<br>(26.0)     | 418,523<br>(22.9)                     | 875,836<br>(27.5)     | 1,294,359<br>(25.8)   | 201,598<br>(21.0)                       | 1,011,326<br>(26.9)    | 1,212,924<br>(25.7)    |
| 59+y                                                               | 516,103<br>(31.3)                      | 621,242<br>(29.7)     | 1,137,345<br>(30.4)    | 219,022<br>(30.2)                    | 334,852<br>(28.7)      | 553,874<br>(29.3)      | 277,963<br>(27.4)                      | 516,790<br>(23.6)     | 794,753<br>(24.8)     | 464,485<br>(25.5)                     | 921,256<br>(28.9)     | 1,385,741<br>(27.7)   | 235,413<br>(24.5)                       | 1,143,674<br>(30.4)    | 1,379,087<br>(29.2)    |
| <b>Sex, N (%)</b>                                                  |                                        |                       |                        |                                      |                        |                        |                                        |                       |                       |                                       |                       |                       |                                         |                        |                        |
| Patient not rostered to a physician/Unknown                        | 155,215<br>(9.4)                       | 21,629<br>(1.0)       | 176,844<br>(4.7)       | 57,914<br>(8.0)                      | 7,674 (0.7)            | 65,588<br>(3.5)        | 118,103<br>(11.7)                      | 19,429<br>(0.9)       | 137,532<br>(4.3)      | 276,931<br>(15.2)                     | 25,431<br>(0.8)       | 302,362<br>(6.0)      | 209,729<br>(21.8%)                      | 64,281<br>(1.7%)       | 274,010<br>(5.8%)      |
| Female                                                             | 4,976 (0.3)                            | 4,138 (0.2)           | 9,114 (0.2)            | 2,151 (0.3)                          | 2,236 (0.2)            | 4,387 (0.2)            | 3,051 (0.3)                            | 3,780 (0.2)           | 6,831 (0.2)           | 6,103 (0.3)                           | 5,805 (0.2)           | 11,908 (0.2)          | 3,135 (0.3%)                            | 8,342 (0.2%)           | 11,477 (0.2%)          |
| Male                                                               | 400,661<br>(24.3)                      | 681,408<br>(32.6)     | 1,082,069<br>(28.9)    | 225,526<br>(31.1)                    | 489,703<br>(42.0)      | 715,229<br>(37.8)      | 285,644<br>(28.2)                      | 1,071,361<br>(49.0)   | 1,357,005<br>(42.4)   | 451,551<br>(24.7)                     | 1,094,040<br>(34.4)   | 1,545,591<br>(30.9)   | 181,660<br>(18.9%)                      | 1,124,469<br>(29.9%)   | 1,306,129<br>(27.7%)   |
|                                                                    | 1,087,212<br>(66.0)                    | 1,383,711<br>(66.2)   | 2,470,923<br>(66.1)    | 438,522<br>(60.6)                    | 666,603<br>(57.2)      | 1,105,125<br>(58.5)    | 606,476<br>(59.9)                      | 1,091,353<br>(49.9)   | 1,697,829<br>(53.1)   | 1,090,496<br>(59.8)                   | 2,059,145<br>(64.7)   | 3,149,641<br>(62.9)   | 566,189<br>(58.9%)                      | 2,559,985<br>(68.1%)   | 3,126,174<br>(66.3%)   |

For Peer Review Only

**Supplementary Table 1.** Descriptive statistics of the screen-eligible cohorts, stratified by screening status.

|                                                     | Received Colorectal Screening? (50-74) |                           |                     | Received Breast Screening? (50-74 y) |                           |                     | Received Cervical Screening? (30-69 y) |                           |                     | Received Glucose Screening? (40-74 y) |                           |                     | Received Cholesterol Screening? (50-74) |                           |                     |
|-----------------------------------------------------|----------------------------------------|---------------------------|---------------------|--------------------------------------|---------------------------|---------------------|----------------------------------------|---------------------------|---------------------|---------------------------------------|---------------------------|---------------------|-----------------------------------------|---------------------------|---------------------|
|                                                     | No                                     | Yes                       | Total               | No                                   | Yes                       | Total               | No                                     | Yes                       | Total               | No                                    | Yes                       | Total               | No                                      | Yes                       | Total               |
|                                                     | <b>1,648,064</b><br>(44 %)             | <b>2,090,886</b><br>(56%) | <b>3,738,950</b>    | <b>724,113</b><br>(38%)              | <b>1,166,216</b><br>(62%) | <b>1,890,329</b>    | <b>1,013,274</b><br>(32%)              | <b>2,185,923</b><br>(68%) | <b>3,199,197</b>    | <b>1,825,081</b><br>(36%)             | <b>3,184,421</b><br>(64%) | <b>5,009,502</b>    | <b>960,713</b><br>(20%)                 | <b>3,757,077</b><br>(80%) | <b>4,717,790</b>    |
| <b>International Medical School Graduate, N (%)</b> |                                        |                           |                     |                                      |                           |                     |                                        |                           |                     |                                       |                           |                     |                                         |                           |                     |
| Patient not rostered to a physician/Unknown         | 155,215<br>(9.4)                       | 21,629<br>(1.0)           | 176,844<br>(4.7)    | 57,914<br>(8.0)                      | 7,674 (0.7)               | 65,588<br>(3.5)     | 118,103<br>(11.7)                      | 19,429<br>(0.9)           | 137,532<br>(4.3)    | 276,931<br>(15.2)                     | 25,431<br>(0.8)           | 302,362<br>(6.0)    | 209,729<br>(21.8)                       | 64,281<br>(1.7)           | 274,010<br>(5.8)    |
| No                                                  | 1,148,570<br>(69.7)                    | 1,675,544<br>(80.1)       | 2,824,114<br>(75.5) | 512,466<br>(70.8)                    | 932,362<br>(79.9)         | 1,444,828<br>(76.4) | 666,915<br>(65.8)                      | 1,686,645<br>(77.2)       | 2,353,560<br>(73.6) | 1,278,385<br>(70.0)                   | 2,439,376<br>(76.6)       | 3,717,761<br>(74.2) | 636,814<br>(66.3)                       | 2,865,454<br>(76.3)       | 3,502,268<br>(74.2) |
| Yes                                                 | 338,817<br>(20.6)                      | 388,871<br>(18.6)         | 727,688<br>(19.5)   | 151,316<br>(20.9)                    | 223,486<br>(19.2)         | 374,802<br>(19.8)   | 224,838<br>(22.2)                      | 475,175<br>(21.7)         | 700,013<br>(21.9)   | 263,109<br>(14.4)                     | 712,733<br>(22.4)         | 975,842<br>(19.5)   | 110,722<br>(11.5)                       | 817,858<br>(21.8)         | 928,580<br>(19.7)   |
| <b>School Region, N (%)</b>                         |                                        |                           |                     |                                      |                           |                     |                                        |                           |                     |                                       |                           |                     |                                         |                           |                     |
| Patient not rostered to a physician/Unknown         | 154,977<br>(11.4)                      | 21,867<br>(0.9)           | 176,844<br>(4.7)    | 57,886<br>(8.0)                      | 7,670 (0.7)               | 65,556<br>(3.5)     | 118,103<br>(11.7)                      | 19,429<br>(0.9)           | 137,532<br>(4.3)    | 276,931<br>(15.2)                     | 25,431<br>(0.8)           | 302,362<br>(6.0)    | 209,729<br>(21.8)                       | 64,281<br>(1.7)           | 274,010<br>(5.8)    |
| Canadian                                            | 830,992<br>(61.3)                      | 1,746,030<br>(73.2)       | 2,577,022<br>(68.9) | 463,040<br>(64.1)                    | 859,187<br>(73.7)         | 1,322,227<br>(70.0) | 603,123<br>(59.5)                      | 1,568,721<br>(71.8)       | 2,171,844<br>(67.9) | 1,162,857<br>(63.7)                   | 2,243,348<br>(70.4)       | 3,406,205<br>(68.0) | 576,075<br>(60.0)                       | 2,620,569<br>(69.8)       | 3,196,644<br>(67.8) |
| USA, Australia, New Zealand, UK, or Ireland         | 85,090<br>(6.3)                        | 139,985<br>(5.9)          | 225,075<br>(6.0)    | 44,680<br>(6.2)                      | 65,905<br>(5.7)           | 110,585<br>(5.9)    | 58,212<br>(5.7)                        | 108,010<br>(4.9)          | 166,222<br>(0.9)    | 102,614<br>(5.6)                      | 179,988<br>(5.7)          | 282,602<br>(5.6)    | 53,534<br>(5.6)                         | 222,412<br>(5.9)          | 275,946<br>(5.8)    |
| Other                                               | 283,748<br>(20.9)                      | 476,261<br>(20.0)         | 760,009<br>(20.3)   | 157,242<br>(21.8)                    | 232,446<br>(19.9)         | 389,688<br>(20.6)   | 233,836<br>(23.1)                      | 489,763<br>(22.4)         | 723,599<br>(22.6)   | 282,679<br>(15.5)                     | 735,654<br>(23.1)         | 1,018,333<br>(20.3) | 121,375<br>(12.6)                       | 849,815<br>(22.6)         | 971,190<br>(20.6)   |



Supplementary Table 2. Descriptive statistics for screen eligible cohorts, stratified by whether patient has an identifiable primary care physician (PCP)

|                                                        | Colorectal (50-74)  |                  |                  | Breast (50-74 y)    |                   |                   | Cervical(30-69 y)   |                    |                    | Glucose (40-74 y)   |                  |                  | Cholesterol (50-74) |                  |                  |
|--------------------------------------------------------|---------------------|------------------|------------------|---------------------|-------------------|-------------------|---------------------|--------------------|--------------------|---------------------|------------------|------------------|---------------------|------------------|------------------|
|                                                        | No Identifiable PCP | Identifiable PCP | Total            | No Identifiable PCP | Identifiable PCP  | Total             | No Identifiable PCP | Identifiable PCP   | Total              | No Identifiable PCP | Identifiable PCP | Total            | No Identifiable PCP | Identifiable PCP | Total            |
|                                                        | 174,516 (5%)        | 3,529,787 (95%)  | 3,704,303        | 64,766 (3%)         | 1,808,811 (97%)   | 1,873,577         | N=135,602 (4%)      | 3,034,575 (96%)    | 3,170,177          | 298,679 (6%)        | 4,666,078 (94%)  | 4,964,757        | 298,679 (6%)        | 4,666,078 (94%)  | 4,964,757        |
| <b>Baseline Characteristics</b>                        |                     |                  |                  |                     |                   |                   |                     |                    |                    |                     |                  |                  |                     |                  |                  |
| <b>Sex, N (%)</b>                                      |                     |                  |                  |                     |                   |                   |                     |                    |                    |                     |                  |                  |                     |                  |                  |
| F                                                      | 65,083 (37.3)       | 1,837,020 (52.0) | 1,902,103 (51.3) | 64,766 (100.0)      | 1,808,811 (100.0) | 1,873,577 (100.0) | 135,602 (100.0)     | 3,034,575 (100.0%) | 3,170,177 (100.0%) | 101,512 (34.0)      | 2,475,557 (53.1) | 2,577,069 (51.9) | 101,512 (34.0)      | 2,475,557 (53.1) | 2,577,069 (51.9) |
| M                                                      | 109,433 (62.7)      | 1,692,767 (48.0) | 1,802,200 (48.7) |                     |                   |                   |                     |                    |                    | 197,167 (66.0)      | 2,190,521 (46.9) | 2,387,688 (48.1) | 197,167 (66.0)      | 2,190,521 (46.9) | 2,387,688 (48.1) |
| <b>Age (years), N (%)</b>                              |                     |                  |                  |                     |                   |                   |                     |                    |                    |                     |                  |                  |                     |                  |                  |
| 30-34                                                  |                     |                  |                  |                     |                   |                   | 21,760 (16.0)       | 392,633 (12.9)     | 414,393 (13.1)     |                     |                  |                  |                     |                  |                  |
| 35-39                                                  |                     |                  |                  |                     |                   |                   | 20,236 (14.9)       | 399,482 (13.2)     | 419,718 (13.2)     |                     |                  |                  |                     |                  |                  |
| 40-44                                                  |                     |                  |                  |                     |                   |                   | 19,835 (14.6)       | 417,921 (13.8)     | 437,756 (13.8)     | 67,496 (22.6)       | 818,832 (17.5)   | 2,387,688 (48.1) | 67,496 (22.6)       | 818,832 (17.5)   | 886,328 (17.9)   |
| 45-49                                                  |                     |                  |                  |                     |                   |                   | 19,684 (14.5)       | 448,029 (14.8)     | 467,713 (14.8)     | 67,543 (22.6)       | 909,849 (19.5)   | 977,392 (19.7)   | 67,543 (22.6)       | 909,849 (19.5)   | 977,392 (19.7)   |
| 50-54                                                  | 59,065 (33.8)       | 950,627 (26.9)   | 1,009,692 (27.3) | 19,027 (29.4)       | 486,420 (26.9)    | 505,447 (27.0)    | 17,559 (12.9)       | 416,829 (13.7)     | 434,388 (13.7)     | 56,999 (19.1)       | 856,008 (18.3)   | 913,007 (18.4)   | 56,999 (19.1)       | 856,008 (18.3)   | 913,007 (18.4)   |
| 55-59                                                  | 45,056 (25.8)       | 825,254 (23.4)   | 870,310 (23.5)   | 16,391 (25.3)       | 423,083 (23.4)    | 439,474 (23.5)    | 15,048 (11.1)       | 357,738 (11.8)     | 372,786 (11.8)     | 42,882 (14.4)       | 710,543 (15.2)   | 753,425 (15.2)   | 42,882 (14.4)       | 710,543 (15.2)   | 753,425 (15.2)   |
| 60-64                                                  | 32,139 (18.4)       | 714,726 (20.2)   | 746,865 (20.2)   | 12,386 (19.1)       | 364,599 (20.2)    | 439,474 (23.5)    | 11,387 (8.4)        | 311,554 (10.3)     | 322,941 (10.3)     | 29,906 (10.0)       | 582,512 (12.5)   | 612,418 (12.3)   | 29,906 (10.0)       | 582,512 (12.5)   | 612,418 (12.3)   |
| 65-69                                                  | 21,653 (12.4)       | 551,373 (15.6)   | 573,026 (15.5)   | 9,244 (14.3)        | 280,091 (15.5)    | 289,335 (15.4)    | 8,689 (6.4)         | 248,483 (8.2)      | 257,172 (8.1)      | 19,542 (6.5)        | 427,249 (9.2)    | 446,791 (9.0)    | 19,542 (6.5)        | 427,249 (9.2)    | 446,791 (9.0)    |
| 70-74                                                  | 16,603 (9.5)        | 487,807 (13.8)   | 504,410 (13.6)   | 7,718 (11.9)        | 254,618 (14.1)    | 262,336 (14.0)    | 1,404 (1.0)         | 41,906 (1.4)       | 43,310 (1.4)       | 14,311 (4.8)        | 361,085 (7.7)    | 375,396 (7.6)    | 14,311 (4.8)        | 361,085 (7.7)    | 375,396 (7.6)    |
| <b>Total # of PCP visits within the last 2y, N (%)</b> |                     |                  |                  |                     |                   |                   |                     |                    |                    |                     |                  |                  |                     |                  |                  |
| 0                                                      | 174,516 (100.0)     | 202,532 (5.7)    | 377,048 (10.2)   | 64,766 (100.0)      | 84,573 (4.7)      | 149,339 (8.0)     | 135,602 (100.0)     | 173,558 (5.7)      | 309,160 (9.8)      | 298,679 (100.0)     | 335,984 (7.2)    | 634,663 (12.8)   | 298,679 (100.0)     | 335,984 (7.2)    | 634,663 (12.8)   |
| 1 to 5                                                 | 0 (0.0)             | 1,380,309 (39.1) | 1,380,309 (37.3) | 0 (0.0)             | 644,200 (35.6)    | 644,200 (34.4)    | 0 (0.0)             | 1,228,667 (40.5)   | 1,228,667 (38.8)   | 0 (0.0)             | 2,077,284 (44.5) | 2,077,284 (41.8) | 0 (0.0)             | 2,077,284 (44.5) | 2,077,284 (41.8) |
| 6 to 10                                                | 0 (0.0)             | 995,053 (28.2)   | 995,053 (26.9)   | 0 (0.0)             | 533,212 (29.5)    | 533,212 (28.5)    | 0 (0.0)             | 859,718 (28.3)     | 859,718 (27.1)     | 0 (0.0)             | 1,237,881 (26.5) | 1,237,881 (24.9) | 0 (0.0)             | 1,237,881 (26.5) | 1,237,881 (24.9) |
| 11+                                                    | 0 (0.0)             | 951,893 (27.0)   | 951,893 (25.7)   | 0 (0.0)             | 546,826 (30.2)    | 546,826 (29.2)    | 0 (0.0)             | 772,632 (25.5)     | 772,632 (24.4)     | 0 (0.0)             | 1,014,929 (21.8) | 1,014,929 (20.4) | 0 (0.0)             | 1,014,929 (21.8) | 1,014,929 (20.4) |
| <b>Immigrant status, N (%)</b>                         |                     |                  |                  |                     |                   |                   |                     |                    |                    |                     |                  |                  |                     |                  |                  |
| Recent immigrant (<8y)                                 | 6,562 (3.8)         | 81,973 (2.3)     | 88,535 (2.4)     | 2,984 (4.6)         | 43,285 (2.4)      | 46,269 (2.5)      | 10,903 (8.0)        | 173,736 (5.7)      | 184,639 (5.8)      | 14,223 (4.8)        | 162,396 (3.5)    | 176,619 (3.6)    | 14,223 (4.8)        | 162,396 (3.5)    | 176,619 (3.6)    |
| Non-distant immigrant (<16y)                           | 9,825 (5.6)         | 141,745 (4.0)    | 151,570 (4.1)    | 4,113 (6.4)         | 71,387 (3.9)      | 75,500 (4.0)      | 13,654 (10.1)       | 216,907 (7.1)      | 230,561 (7.3)      | 22,330 (7.5)        | 264,325 (5.7)    | 286,655 (5.8)    | 22,330 (7.5)        | 264,325 (5.7)    | 286,655 (5.8)    |
| Distant immigrant (<28 y)                              | 12,449 (7.1)        | 241,583 (6.8)    | 254,032 (6.9)    | 4,687 (7.2)         | 120,717 (6.7)     | 25,404 (6.7)      | 9,536 (7.0)         | 224,857 (7.4)      | 234,393 (7.4)      | 20,971 (7.0)        | 333,037 (7.1)    | 354,008 (7.1)    | 20,971 (7.0)        | 333,037 (7.1)    | 354,008 (7.1)    |
| Non-immigrant (28+ years)                              | 145,680 (83.5)      | 3,064,486 (86.8) | 3,210,166 (86.7) | 52,982 (81.8)       | 1,573,422 (87.0)  | 1,626,404 (86.8)  | 101,509 (74.9)      | 2,419,075 (79.7)   | 2,520,584 (79.5)   | 241,155 (80.7)      | 3,906,320 (83.7) | 4,147,475 (83.5) | 241,155 (80.7)      | 3,906,320 (83.7) | 4,147,475 (83.5) |
| <b>DA-level Characteristics</b>                        |                     |                  |                  |                     |                   |                   |                     |                    |                    |                     |                  |                  |                     |                  |                  |
| <b>Neighbourhood Income Quintile, N</b>                |                     |                  |                  |                     |                   |                   |                     |                    |                    |                     |                  |                  |                     |                  |                  |

**Supplementary Table 2.** Descriptive statistics for screen eligible cohorts, stratified by whether patient has an identifiable primary care physician (PCP)

|                                                                    | Colorectal (50-74)              |                                 |                                 | Breast (50-74 y)                |                                 |                                 | Cervical(30-69 y)              |                             |                             | Glucose (40-74 y)               |                             |                             | Cholesterol (50-74)             |                             |                             |
|--------------------------------------------------------------------|---------------------------------|---------------------------------|---------------------------------|---------------------------------|---------------------------------|---------------------------------|--------------------------------|-----------------------------|-----------------------------|---------------------------------|-----------------------------|-----------------------------|---------------------------------|-----------------------------|-----------------------------|
|                                                                    | No Identifiable PCP             | Identifiable PCP                | Total                           | No Identifiable PCP             | Identifiable PCP                | Total                           | No Identifiable PCP            | Identifiable PCP            | Total                       | No Identifiable PCP             | Identifiable PCP            | Total                       | No Identifiable PCP             | Identifiable PCP            | Total                       |
|                                                                    | 174,516 (5%)                    | 3,529,787 (95%)                 | 3,704,303                       | 64,766 (3%)                     | 1,808,811 (97%)                 | 1,873,577                       | N=135,602 (4%)                 | 3,034,575 (96%)             | 3,170,177                   | 298,679 (6%)                    | 4,666,078 (94%)             | 4,964,757                   | 298,679 (6%)                    | 4,666,078 (94%)             | 4,964,757                   |
| (%)                                                                |                                 |                                 |                                 |                                 |                                 |                                 |                                |                             |                             |                                 |                             |                             |                                 |                             |                             |
| Q1                                                                 | 34,435 (19.7)                   | 516,120 (14.6)                  | 550,555 (14.9)                  | 12,278 (19.0)                   | 270,329 (14.9)                  | 282,607 (15.1)                  | 28,082 (20.7)                  | 477,967 (15.8)              | 506,049 (16.0)              | 60,052 (20.1)                   | 667,353 (14.3)              | 727,405 (14.7)              | 60,052 (20.1)                   | 667,353 (14.3)              | 727,405 (14.7)              |
| Q2                                                                 | 29,918 (17.1)                   | 585,275 (16.6)                  | 615,193 (16.6)                  | 11,019 (17.0)                   | 304,667 (16.8)                  | 315,686 (16.8)                  | 24,019 (17.7)                  | 519,262 (17.1)              | 543,281 (17.1)              | 52,282 (17.5)                   | 761,415 (16.3)              | 813,697 (16.4)              | 52,282 (17.5)                   | 761,415 (16.3)              | 813,697 (16.4)              |
| Q3                                                                 | 26,981 (15.5)                   | 604,412 (17.1)                  | 631,393 (17.0)                  | 10,189 (15.7)                   | 310,821 (17.2)                  | 321,010 (17.1)                  | 21,797 (16.1)                  | 547,999 (18.1)              | 569,796 (18.0)              | 47,258 (15.8)                   | 813,919 (17.4)              | 861,177 (17.3)              | 47,258 (15.8)                   | 813,919 (17.4)              | 861,177 (17.3)              |
| Q4                                                                 | 26,840 (15.4)                   | 657,806 (18.6)                  | 684,646 (18.5)                  | 10,082 (15.6)                   | 335,665 (18.6)                  | 345,747 (18.5)                  | 21,447 (15.8)                  | 594,845 (19.6)              | 616,292 (19.4)              | 46,897 (15.7)                   | 905,710 (19.4)              | 952,607 (19.2)              | 46,897 (15.7)                   | 905,710 (19.4)              | 952,607 (19.2)              |
| Q5                                                                 | 29,434 (16.9)                   | 690,933 (19.6)                  | 720,367 (19.4)                  | 11,179 (17.3)                   | 350,189 (19.4)                  | 361,368 (19.3)                  | 22,897 (16.9)                  | 574,113 (18.9)              | 597,010 (18.8)              | 49,474 (16.6)                   | 935,144 (20.0)              | 984,618 (19.8)              | 49,474 (16.6)                   | 935,144 (20.0)              | 984,618 (19.8)              |
| Rural                                                              | 26,908 (15.4)                   | 475,241 (13.5)                  | 502,149 (13.6)                  | 10,019 (15.5)                   | 237,140 (13.1)                  | 247,159 (13.2)                  | 17,360 (12.8)                  | 320,389 (10.6)              | 337,749 (10.7)              | 42,716 (14.3)                   | 582,537 (12.5)              | 625,253 (12.6)              | 42,716 (14.3)                   | 582,537 (12.5)              | 625,253 (12.6)              |
| <b>% of DA who have not completed high school</b>                  |                                 |                                 |                                 |                                 |                                 |                                 |                                |                             |                             |                                 |                             |                             |                                 |                             |                             |
| Mean                                                               | 19.537                          | 18.427                          | 18.487                          | 19.367                          | 18.447                          | 18.477                          | 18.687                         | 17.667                      | 17.707                      | 19.287                          | 17.907                      | 17.987                      | 19.287                          | 17.907                      | 17.987                      |
| Median (IQR)                                                       | 12.07<br>18.00<br>(10.53-26.61) | 10.72<br>17.04<br>(10.29-25.00) | 10.79<br>17.07<br>(10.31-25.00) | 12.22<br>17.74<br>(10.30-26.26) | 10.73<br>17.04<br>(10.31-25.00) | 10.78<br>17.07<br>(10.31-25.00) | 12.37<br>16.76<br>(9.65-25.22) | 10.56<br>16.16 (9.67-23.81) | 10.64<br>16.18 (9.67-23.87) | 11.87<br>17.74<br>(10.39-26.23) | 10.62<br>16.46 (9.85-24.19) | 10.70<br>16.51 (9.88-24.32) | 11.87<br>17.74<br>(10.39-26.23) | 10.62<br>16.46 (9.85-24.19) | 10.70<br>16.51 (9.88-24.32) |
| Range                                                              | 0.00-100.00                     | 0.00-100.00                     | 0.00-100.00                     | 0.00-100.00                     | 0.00-100.00                     | 0.00-100.00                     | 0.00-100.00                    | 0.00-100.00                 | 0.00-100.00                 | 0.00-100.00                     | 0.00-100.00                 | 0.00-100.00                 | 0.00-100.00                     | 0.00-100.00                 | 0.00-100.00                 |
| <b>% of DA whose home language is not English or French, N (%)</b> |                                 |                                 |                                 |                                 |                                 |                                 |                                |                             |                             |                                 |                             |                             |                                 |                             |                             |
| 0                                                                  | 95,044 (54.5)                   | 1,980,652 (56.1)                | 2,075,696 (56.0)                | 34,893 (53.9)                   | 1,009,196 (55.8)                | 1,044,089 (55.7)                | 66,211 (48.8)                  | 1,534,976 (50.6)            | 1,601,187 (50.5)            | 158,749 (53.2)                  | 2,558,066 (54.8)            | 2,716,815 (54.7)            | 158,749 (53.2%)                 | 2,558,066 (54.8)            | 2,716,815 (54.7)            |
| Low                                                                | 38,674 (22.2)                   | 801,124 (22.7)                  | 839,798 (22.7)                  | 14,478 (22.4)                   | 413,573 (22.9)                  | 428,051 (22.8)                  | 32,615 (24.1)                  | 762,598 (25.1)              | 795,213 (25.1)              | 68,010 (22.8)                   | 1,108,190 (23.7)            | 1,176,200 (23.7)            | 68,010 (22.8%)                  | 1,108,190 (23.7)            | 1,176,200 (23.7)            |
| High                                                               | 40,798 (23.4)                   | 748,011 (21.2)                  | 788,809 (21.3)                  | 15,395 (23.8)                   | 386,042 (21.3)                  | 401,437 (21.4)                  | 36,776 (27.1)                  | 737,001 (24.3)              | 773,777 (24.4)              | 71,920 (24.1)                   | 999,822 (21.4)              | 1,071,742 (21.6)            | 71,920 (24.1)                   | 999,822 (21.4)              | 1,071,742 (21.6)            |
| <b>Screened?, N (%)</b>                                            |                                 |                                 |                                 |                                 |                                 |                                 |                                |                             |                             |                                 |                             |                             |                                 |                             |                             |
| No                                                                 | 153,260 (87.8)                  | 1,477,144 (41.8)                | 1,630,404 (44.0)                | 57,257 (88.4)                   | 659,256 (36.4)                  | 716,513 (38.2)                  | 116,667 (86.0)                 | 885,315 (29.2)              | 1,001,982 (31.6)            | 273,655 (91.6)                  | 1,530,178 (32.8)            | 1,803,833 (36.3)            | 273,655 (91.6%)                 | 1,530,178 (32.8)            | 1,803,833 (36.3)            |
| Yes                                                                | 21,256 (12.2)                   | 2,052,643 (58.2)                | 2,073,899 (56.0)                | 7,509 (11.6)                    | 1,149,555 (63.6)                | 1,157,064 (61.8)                | 18,935 (14.0)                  | 2,149,260 (70.8)            | 2,168,195 (68.4)            | 25,024 (8.4)                    | 3,135,900 (67.2)            | 3,160,924 (63.7)            | 25,024 (8.4)                    | 3,135,900 (67.2)            | 3,160,924 (63.7)            |

**Supplementary Table 3.** Descriptive Statistics of patients with an identifiable physician.

|                                                        | Received Colorectal Screening? (50-74) |                     |                     | Received Breast Screening? (50-74 y) |                     |                      | Received Cervical Screening? (30-69 y) |                     |                      | Received Glucose Screening? (40-74 y) |                     |                     | Received Cholesterol Screening? (50-74) |                     |                     |
|--------------------------------------------------------|----------------------------------------|---------------------|---------------------|--------------------------------------|---------------------|----------------------|----------------------------------------|---------------------|----------------------|---------------------------------------|---------------------|---------------------|-----------------------------------------|---------------------|---------------------|
|                                                        | No                                     | Yes                 | Total               | No                                   | Yes                 | Total                | No                                     | Yes                 | Total                | No                                    | Yes                 | Total               | No                                      | Yes                 | Total               |
|                                                        | 1,477,144<br>(42%)                     | 2,052,643<br>(58%)  | 3,529,787           | 659,256<br>(36%)                     | 1,149,555<br>(64%)  | 1,808,811            | 885,315<br>(29%)                       | 2,149,260<br>(71%)  | 3,034,575            | 1,530,178<br>(33%)                    | 3,135,900<br>(67%)  | 4,666,078           | 740,385<br>(17%)                        | 3,662,747<br>(83%)  | 4,403,132           |
| <b>Baseline Characteristics</b>                        |                                        |                     |                     |                                      |                     |                      |                                        |                     |                      |                                       |                     |                     |                                         |                     |                     |
| <b>Sex, N (%)</b>                                      |                                        |                     |                     |                                      |                     |                      |                                        |                     |                      |                                       |                     |                     |                                         |                     |                     |
| F                                                      | 732,194<br>(39.9)                      | 1,104,826<br>(60.1) | 1,837,020<br>(52.0) | 659,256<br>(36.4)                    | 1,149,555<br>(63.6) | 1,808,811<br>(100.0) | 885,315<br>(29.2)                      | 2,149,260<br>(70.8) | 3,034,575<br>(100.0) | 714,941<br>(28.9)                     | 1,760,616<br>(71.1) | 2,475,557<br>(53.1) | 226,554<br>(12.2)                       | 1,626,310<br>(87.8) | 1,852,864<br>(42.1) |
| M                                                      | 744,950<br>(44.0)                      | 947,817<br>(56.0)   | 1,692,767<br>(48.0) | 0 (0)                                | 0 (0)               | 0 (0)                |                                        |                     |                      | 815,237<br>(37.2)                     | 1,375,284<br>(62.8) | 2,190,521<br>(46.9) | 513,831<br>(20.1)                       | 2,036,437<br>(79.9) | 2,550,268<br>(57.9) |
| <b>Age, N (%)</b>                                      |                                        |                     |                     |                                      |                     |                      |                                        |                     |                      |                                       |                     |                     |                                         |                     |                     |
| 30-34                                                  |                                        |                     |                     |                                      |                     |                      | 93,597<br>(23.8)                       | 299,036<br>(76.2)   | 392,633<br>(12.9)    |                                       |                     |                     |                                         |                     |                     |
| 35-39                                                  |                                        |                     |                     |                                      |                     |                      | 95,611<br>(23.9)                       | 303,871<br>(76.1)   | 399,482<br>(13.2)    |                                       |                     |                     |                                         |                     |                     |
| 40-44                                                  |                                        |                     |                     |                                      |                     |                      | 103,793<br>(24.8)                      | 314,128<br>(75.2)   | 417,921<br>(13.8)    | 356,251<br>(43.5)                     | 462,581<br>(56.5)   | 818,832<br>(17.5)   | 136,308<br>(33.2)                       | 273,747<br>(66.8)   | 2,550,268<br>(57.9) |
| 45-49                                                  |                                        |                     |                     |                                      |                     |                      | 115,264<br>(25.7)                      | 332,765<br>(74.3)   | 448,029<br>(14.8)    | 358,391<br>(39.4)                     | 551,458<br>(60.6)   | 909,849<br>(19.5)   | 126,642<br>(26.8)                       | 345,777<br>(73.2)   | 472,419<br>(10.7)   |
| 50-54                                                  | 505,160<br>(53.1)                      | 445,467<br>(46.9)   | 950,627<br>(26.9)   | 206,341<br>(42.4)                    | 105,431<br>(41.4)   | 486,420<br>(26.9)    | 111,944<br>(26.9)                      | 304,885<br>(73.1)   | 416,829<br>(13.7)    | 292,299<br>(34.1)                     | 563,709<br>(65.9)   | 856,008<br>(18.3)   | 172,497<br>(18.1)                       | 778,564<br>(81.9)   | 951,061<br>(21.6)   |
| 55-59                                                  | 350,464<br>(42.5)                      | 474,790<br>(57.5)   | 825,254<br>(23.4)   | 145,267<br>(34.3)                    | 277,816<br>(65.7)   | 423,083<br>(23.4)    | 112,527<br>(31.5)                      | 245,211<br>(23.4)   | 357,738<br>(11.8)    | 215,943<br>(30.4)                     | 494,600<br>(69.6)   | 710,543<br>(15.2)   | 122,794<br>(14.9)                       | 700,851<br>(85.1)   | 823,645<br>(18.7)   |
| 60-64                                                  | 266,658<br>(37.3)                      | 448,068<br>(62.7)   | 825,254<br>(23.4)   | 115,072<br>(31.6)                    | 249,527<br>(68.4)   | 364,599<br>(20.2)    | 112,527<br>(31.5)                      | 194,707<br>(62.5)   | 311,554<br>(10.3)    | 148,741<br>(25.5)                     | 433,771<br>(74.5)   | 582,512<br>(12.5)   | 84,446<br>(11.9)                        | 626,968<br>(88.1)   | 711,414<br>(16.2)   |
| 65-69                                                  | 266,658<br>(37.3)                      | 365,027<br>(66.2)   | 551,373<br>(15.6)   | 87,145<br>(31.1)                     | 192,946<br>(68.9)   | 280,091<br>(15.5)    | 112,949<br>(45.5)                      | 135,534<br>(54.5)   | 248,483<br>(8.2)     | 90,938<br>(21.3)                      | 336,311<br>(78.7)   | 427,249<br>(9.2)    | 54,159<br>(9.9)                         | 494,109<br>(78.7)   | 548,268<br>(12.5)   |
| 70-74                                                  | 168,516<br>(34.5)                      | 319,291<br>(65.5)   | 487,807<br>(13.8)   | 105,431<br>(41.4)                    | 149,187<br>(58.6)   | 254,618<br>(14.1)    | 22,783<br>(54.4)                       | 19,123<br>(45.6)    | 41,906<br>(1.4)      | 67,615<br>(18.7)                      | 293,470<br>(81.3)   | 361,085<br>(7.7)    | 43,539<br>(9.0)                         | 442,731<br>(91.0)   | 486,270<br>(11.0)   |
| <b>Total # of PCP visits within the last 2y, N (%)</b> |                                        |                     |                     |                                      |                     |                      |                                        |                     |                      |                                       |                     |                     |                                         |                     |                     |
| 0                                                      | 150,789<br>(74.5)                      | 51,743<br>(25.5)    | 202,532<br>(5.7)    | 62,525<br>(73.9)                     | 22,048<br>(26.1)    | 394,545<br>(64.3)    | 114,889<br>(66.2)                      | 58,669<br>(33.8)    | 173,558<br>(5.7)     | 286,698<br>(85.3)                     | 49,286<br>(14.7)    | 335,984<br>(7.2)    | 147,113<br>(48.9)                       | 153,686<br>(51.1)   | 300,799<br>(6.8)    |
| 1 to 5                                                 | 662,736<br>(48.0)                      | 717,573<br>(52.0)   | 1,380,309<br>(39.1) | 265,152<br>(41.2)                    | 379,048<br>(58.8)   | 394,545<br>(64.3)    | 382,484<br>(31.1)                      | 846,183<br>(68.9)   | 1,228,667<br>(40.5)  | 857,011<br>(41.3)                     | 1,220,273<br>(58.7) | 2,077,284<br>(44.5) | 413,761<br>(22.2)                       | 1,446,174<br>(77.8) | 1,859,935<br>(42.2) |
| 6 to 10                                                | 350,362<br>(35.2)                      | 644,691<br>(64.8)   | 995,053<br>(28.2)   | 162,560<br>(30.5)                    | 370,652<br>(69.5)   | 394,545<br>(64.3)    | 198,038<br>(23.0)                      | 661,680<br>(77.0)   | 859,718<br>(28.3)    | 244,601<br>(19.8)                     | 993,280<br>(80.2)   | 1,237,881<br>(26.5) | 108,331<br>(9.2)                        | 1,067,074<br>(90.8) | 1,175,405<br>(26.7) |
| 11+                                                    | 313,257<br>(32.9)                      | 638,636<br>(67.1)   | 951,893<br>(27.0)   | 169,019<br>(30.9)                    | 377,807<br>(69.1)   | 546,826<br>(30.2)    | 189,904<br>(24.6)                      | 582,728<br>(75.4)   | 772,632<br>(25.5)    | 141,868<br>(14.0)                     | 873,061<br>(86.0)   | 1,014,929<br>(21.8) | 71,180<br>(6.7)                         | 995,813<br>(93.3)   | 1,066,993<br>(24.2) |
| <b>Immigrant status, N (%)</b>                         |                                        |                     |                     |                                      |                     |                      |                                        |                     |                      |                                       |                     |                     |                                         |                     |                     |
| Recent immigrant (<8y)                                 | 45,902<br>(56.0)                       | 36,071<br>(44.0)    | 81,973 (2.3)        | 22,340<br>(51.6)                     | 20,945<br>(48.4)    | 43,285 (2.4)         | 58,160<br>(33.5)                       | 115,576<br>(66.5)   | 173,736<br>(5.7)     | 45,383<br>(27.9)                      | 117,013<br>(72.1)   | 162,396<br>(3.5)    | 16,402<br>(12.6)                        | 114,128<br>(87.4)   | 130,530<br>(3.0)    |
| Non-distant immigrant (<16y)                           | 71,665<br>(50.6)                       | 70,080<br>(49.4)    | 141,745<br>(4.0)    | 32,914<br>(46.1)                     | 38,473<br>(53.9)    | 71,387 (3.9)         | 69,311<br>(32.0)                       | 115,576<br>(66.5)   | 173,736<br>(5.7)     | 69,868<br>(26.4)                      | 194,457<br>(73.6)   | 264,325<br>(5.7)    | 24,993<br>(11.3)                        | 196,621<br>(88.7)   | 221,614<br>(5.0)    |
| Distant immigrant (<28 y)                              | 113,363<br>(46.9)                      | 128,220<br>(53.1)   | 241,583<br>(6.8)    | 49,176<br>(40.7)                     | 71,541<br>(59.3)    | 120,717<br>(6.7)     | 69,311<br>(32.0)                       | 155,896<br>(69.3)   | 224,857<br>(7.4)     | 69,868<br>(26.4)                      | 251,740<br>(75.6)   | 333,037<br>(7.1)    | 32,391<br>(10.2)                        | 285,002<br>(89.8)   | 317,393<br>(7.2)    |
| Non-immigrant (28+ years)                              | 1,246,214<br>(40.7)                    | 1,818,272<br>(59.3) | 3,064,486<br>(86.8) | 554,826<br>(35.3)                    | 1,018,596<br>(64.7) | 1,573,422<br>(87.0)  | 688,883<br>(28.5)                      | 1,730,192<br>(71.5) | 2,419,075<br>(79.7)  | 1,333,630<br>(34.1)                   | 2,572,690<br>(65.9) | 3,906,320<br>(83.7) | 666,599<br>(17.9)                       | 3,066,996<br>(82.1) | 3,733,595<br>(84.8) |
| <b>Patient rostered to a physician?, N (%)</b>         |                                        |                     |                     |                                      |                     |                      |                                        |                     |                      |                                       |                     |                     |                                         |                     |                     |
| Yes, to a Non-PEM Physician                            | 122,315<br>(57.8)                      | 89,477<br>(42.2)    | 211,792<br>(6.0)    | 48,577<br>(48.6)                     | 51,434<br>(51.4)    | 100,011<br>(5.5)     | 688,883<br>(28.5)                      | 97,111<br>(57.3)    | 2,419,075<br>(79.7)  | 99,972<br>(35.5)                      | 181,807<br>(64.5)   | 281,779<br>(6.0)    | 59,349<br>(21.8)                        | 213,483<br>(78.2)   | 272,832<br>(6.2%)   |
| Yes, to a PEM physician, but not enrolled in a model   | 123,276<br>(58.6)                      | 87,002<br>(41.4)    | 210,278<br>(6.0)    | 49,887<br>(52.9)                     | 44,431<br>(47.1)    | 94,318 (5.2)         | 81,556<br>(43.4)                       | 106,192<br>(56.6)   | 2,419,075<br>(79.7)  | 140,878<br>(43.9)                     | 180,026<br>(56.1)   | 320,904<br>(6.9)    | 88,102<br>(29.9)                        | 206,992<br>(70.1)   | 295,094<br>(6.7%)   |

For Peer Review Only

**Supplementary Table 3. Descriptive Statistics of patients with an identifiable physician.**

|                                                                    | Received Colorectal Screening? (50-74) |                     |                     | Received Breast Screening? (50-74 y) |                     |                     | Received Cervical Screening? (30-69 y) |                     |                     | Received Glucose Screening? (40-74 y) |                     |                     | Received Cholesterol Screening? (50-74) |                     |                      |
|--------------------------------------------------------------------|----------------------------------------|---------------------|---------------------|--------------------------------------|---------------------|---------------------|----------------------------------------|---------------------|---------------------|---------------------------------------|---------------------|---------------------|-----------------------------------------|---------------------|----------------------|
|                                                                    | No                                     | Yes                 | Total               | No                                   | Yes                 | Total               | No                                     | Yes                 | Total               | No                                    | Yes                 | Total               | No                                      | Yes                 | Total                |
|                                                                    | 1,477,144<br>(42%)                     | 2,052,643<br>(58%)  | 3,529,787           | 659,256<br>(36%)                     | 1,149,555<br>(64%)  | 1,808,811           | 885,315<br>(29%)                       | 2,149,260<br>(71%)  | 3,034,575           | 1,530,178<br>(33%)                    | 3,135,900<br>(67%)  | 4,666,078           | 740,385<br>(17%)                        | 3,662,747<br>(83%)  | 4,403,132            |
| Yes, to a PEM physician via CAPE                                   | 1,231,553<br>(39.6)                    | 1,876,164<br>(60.4) | 3,107,717<br>(88.0) | 560,792<br>(34.7)                    | 1,053,690<br>(65.3) | 1,614,482<br>(89.3) | 731,263<br>(27.3)                      | 1,945,957<br>(72.7) | 2,677,220<br>(88.2) | 1,289,328<br>(31.7)                   | 2,774,067<br>(68.3) | 4,063,395<br>(87.1) | 592,934<br>(15.5)                       | 3,242,272<br>(84.5) | 3,835,206<br>(87.1%) |
| <b>DA-level Characteristics</b>                                    |                                        |                     |                     |                                      |                     |                     |                                        |                     |                     |                                       |                     |                     |                                         |                     |                      |
| <b>Neighbourhood Income Quintile, N (%)</b>                        |                                        |                     |                     |                                      |                     |                     |                                        |                     |                     |                                       |                     |                     |                                         |                     |                      |
| Q1                                                                 | 251,525<br>(48.7)                      | 264,595<br>(51.3)   | 516,120<br>(14.6)   | 118,736<br>(43.9)                    | 151,593<br>(56.1)   | 270,329<br>(14.9)   | 175,641<br>(36.7)                      | 302,326<br>(63.3)   | 477,967<br>(15.8)   | 219,776<br>(32.9)                     | 447,577<br>(67.1)   | 667,353<br>(14.3)   | 110,487<br>(16.9)                       | 542,795<br>(83.1%)  | 653,282<br>(14.8%)   |
| Q2                                                                 | 261,206<br>(44.6)                      | 324,069<br>(55.4)   | 585,275<br>(16.6)   | 118,037<br>(38.7)                    | 186,630<br>(61.3)   | 304,667<br>(16.8)   | 167,177<br>(32.2)                      | 352,085<br>(67.8)   | 519,262<br>(17.1)   | 238,072<br>(31.3)                     | 523,343<br>(68.7)   | 761,415<br>(16.3)   | 111,862<br>(15.2)                       | 621,774<br>(84.8%)  | 733,636<br>(16.7%)   |
| Q3                                                                 | 254,611<br>(42.1)                      | 349,801<br>(57.9)   | 604,412<br>(17.1)   | 112,900<br>(36.3)                    | 197,921<br>(63.7)   | 310,821<br>(17.2)   | 157,317<br>(28.7)                      | 390,682<br>(71.3)   | 519,262<br>(17.1)   | 248,925<br>(30.6)                     | 564,994<br>(69.4)   | 813,919<br>(17.4)   | 111,869<br>(14.6)                       | 652,846<br>(85.4%)  | 733,636<br>(16.7%)   |
| Q4                                                                 | 260,129<br>(39.5)                      | 397,677<br>(60.5)   | 657,806<br>(18.6)   | 113,411<br>(33.8)                    | 222,254<br>(66.2)   | 335,665<br>(18.6)   | 157,317<br>(28.7)                      | 442,261<br>(74.3)   | 594,845<br>(19.6)   | 272,918<br>(30.1)                     | 632,792<br>(69.9)   | 905,710<br>(19.4)   | 118,560<br>(14.2)                       | 715,753<br>(85.8%)  | 834,313<br>(18.9%)   |
| Q5                                                                 | 244,746<br>(35.4)                      | 446,187<br>(64.6)   | 690,933<br>(19.6)   | 109,830<br>(31.4)                    | 240,359<br>(68.6)   | 350,189<br>(19.4)   | 135,080<br>(23.5)                      | 439,033<br>(76.5)   | 574,113<br>(18.9)   | 288,202<br>(30.8)                     | 646,942<br>(69.2)   | 935,144<br>(20.0)   | 123,746<br>(14.5)                       | 729,569<br>(85.5%)  | 853,315<br>(19.4%)   |
| Rural                                                              | 204,927<br>(43.1)                      | 270,314<br>(56.9)   | 475,241<br>(13.5)   | 86,342<br>(36.4)                     | 240,359<br>(68.6)   | 237,140<br>(13.1)   | 97,516<br>(30.4)                       | 222,873<br>(69.6)   | 320,389<br>(10.6)   | 262,285<br>(45.0)                     | 320,252<br>(55.0)   | 582,537<br>(12.5)   | 163,861<br>(29.1)                       | 400,010<br>(70.9%)  | 563,871<br>(12.8%)   |
| <b>% of DA who have not completed high school, N (%)</b>           |                                        |                     |                     |                                      |                     |                     |                                        |                     |                     |                                       |                     |                     |                                         |                     |                      |
| Mean                                                               | 19.21 ± 10.82                          | 17.86 ± 10.62       | 18.42 ± 10.72       | 19.17 ± 10.85                        | 18.01 ± 10.63       | 18.44 ± 10.73       | 18.99 ± 10.82                          | 17.11 ± 10.40       | 17.66 ± 10.56       | 18.59 ± 10.89                         | 17.56 ± 10.47       | 17.90 ± 10.62       | 19.57 ± 11.12                           | 18.00 ± 10.59       | 18.26 ± 10.70        |
| Median (IQR)                                                       | 17.95 (11.11-25.74)                    | 16.44 (9.80-24.24)  | 17.04 (10.29-25.00) | 17.91 (10.98-25.71)                  | 16.67 (10.00-24.39) | 17.04 (10.31-25.00) | 17.65 (10.81-25.42)                    | 15.53 (9.21-23.17)  | 16.16 (9.67-23.81)  | 17.24 (10.26-25.27)                   | 16.07 (9.65-23.68)  | 16.46 (9.85-24.19)  | 18.39 (11.11-26.67)                     | 16.54 (10.00-24.24) | 16.84 (10.14-24.64)  |
| Range                                                              | 0.00-100.00                            | 0.00-100.00         | 0.00-100.00         | 0.00-100.00                          | 0.00-100.00         | 0.00-100.00         | 0.00-100.00                            | 0.00-100.00         | 0.00-100.00         | 0.00-100.00                           | 0.00-100.00         | 0.00-100.00         | 0.00-100.00                             | 0.00-100.00         | 0.00-100.00          |
| <b>% of DA whose home language is not English or French, N (%)</b> |                                        |                     |                     |                                      |                     |                     |                                        |                     |                     |                                       |                     |                     |                                         |                     |                      |
| 0                                                                  | 814,238<br>(41.1)                      | 1,166,414<br>(58.9) | 1,980,652<br>(56.1) | 357,430<br>(35.4)                    | 651,766<br>(64.6)   | 1,009,196<br>(55.8) | 438,086<br>(28.5)                      | 1,096,890<br>(71.5) | 1,534,976<br>(50.6) | 921,919<br>(36.0)                     | 1,636,147<br>(64.0) | 2,558,066<br>(54.8) | 469,337<br>(19.4)                       | 1,945,139<br>(80.6) | 2,414,476<br>(54.8)  |
| Low                                                                | 333,055<br>(41.6)                      | 468,069<br>(58.4)   | 801,124<br>(22.7)   | 150,622<br>(36.4)                    | 262,951<br>(63.6)   | 413,573<br>(22.9)   | 212,514<br>(27.9)                      | 550,084<br>(72.1)   | 762,598<br>(25.1)   | 342,032<br>(30.9)                     | 766,158<br>(69.1)   | 1,108,190<br>(23.7) | 154,802<br>(15.1)                       | 870,968<br>(84.9)   | 1,025,770<br>(23.3)  |
| High                                                               | 329,851<br>(44.1)                      | 418,160<br>(55.9)   | 748,011<br>(21.2)   | 151,204<br>(39.2)                    | 234,838<br>(60.8)   | 386,042<br>(21.3)   | 234,715<br>(31.8)                      | 502,286<br>(68.2)   | 737,001<br>(24.3)   | 266,227<br>(26.6)                     | 733,595<br>(73.4)   | 999,822<br>(21.4)   | 116,246<br>(12.1)                       | 846,640<br>(87.9)   | 962,886<br>(21.9)    |
| <b>Physician-level Characteristics</b>                             |                                        |                     |                     |                                      |                     |                     |                                        |                     |                     |                                       |                     |                     |                                         |                     |                      |
| <b>Sex, N (%)</b>                                                  |                                        |                     |                     |                                      |                     |                     |                                        |                     |                     |                                       |                     |                     |                                         |                     |                      |
| Female                                                             | 397,706<br>(37.0)                      | 677,256<br>(63.0)   | 1,074,962<br>(30.5) | 223,825<br>(31.5)                    | 486,900<br>(68.5)   | 710,725<br>(39.3)   | 283,310<br>(21.0)                      | 1,064,804<br>(79.0) | 1,348,114<br>(44.4) | 447,935<br>(29.2)                     | 1,088,217<br>(70.8) | 1,536,152<br>(32.9) | 179,624<br>(13.8)                       | 1,117,823<br>(86.2) | 1,297,447<br>(29.5)  |
| Male                                                               | 1,079,438<br>(44.0)                    | 1,375,387<br>(56.0) | 2,454,825<br>(69.5) | 435,431<br>(39.7)                    | 662,655<br>(60.3)   | 1,098,086<br>(60.7) | 602,005<br>(35.7)                      | 1,084,456<br>(64.3) | 1,686,461<br>(55.6) | 1,082,243<br>(34.6)                   | 2,047,683<br>(65.4) | 3,129,926<br>(67.1) | 560,761<br>(18.1)                       | 2,544,924<br>(81.9) | 3,105,685<br>(70.5)  |
| <b>School Region, N (%)</b>                                        |                                        |                     |                     |                                      |                     |                     |                                        |                     |                     |                                       |                     |                     |                                         |                     |                      |
| Canada                                                             | 1,026,868<br>(40.1)                    | 1,533,687<br>(59.9) | 2,560,555<br>(72.5) | 460,683<br>(35.0)                    | 855,115<br>(65.0)   | 1,315,798<br>(72.7) | 598,577<br>(27.7)                      | 1,084,456<br>(64.3) | 2,158,043<br>(71.1) | 1,154,000<br>(34.1)                   | 2,231,790<br>(65.9) | 3,385,790<br>(72.6) | 570,331<br>(18.0)                       | 2,605,822<br>(82.0) | 3,176,153<br>(72.1)  |
| United States, Australia, New Zealand, United Kingdom, and Ireland | 104,164<br>(46.6)                      | 119,469<br>(53.4)   | 223,633<br>(6.3)    | 44,426<br>(40.4)                     | 65,579<br>(59.6)    | 110,005<br>(6.1)    | 57,762<br>(35.0)                       | 107,300<br>(65.0)   | 165,062<br>(5.4)    |                                       | 178,981<br>(63.7)   | 280,860<br>(6.0)    | 53,065<br>(19.4)                        | 221,102<br>(80.6)   |                      |
| Other                                                              | 346,112<br>(46.4)                      | 399,487<br>(53.6)   | 745,599<br>(21.1)   | 154,147<br>(40.2)                    | 228,861<br>(59.8)   | 383,008<br>(21.2)   | 228,976<br>(32.2)                      | 482,494<br>(67.8)   | 711,470<br>(23.4)   | 1,154,000<br>(34.1)                   | 274,299<br>(72.6)   | 280,860<br>(6.0)    | 116,989<br>(12.3)                       | 835,823<br>(87.7)   | 952,812<br>(21.6)    |

**Supplementary Table 3.** Descriptive Statistics of patients with an identifiable physician.

|                                                | Received Colorectal Screening? (50-74) |                    |                     | Received Breast Screening? (50-74 y) |                    |                   | Received Cervical Screening? (30-69 y) |                    |                   | Received Glucose Screening? (40-74 y) |                     |                     | Received Cholesterol Screening? (50-74) |                     |                     |
|------------------------------------------------|----------------------------------------|--------------------|---------------------|--------------------------------------|--------------------|-------------------|----------------------------------------|--------------------|-------------------|---------------------------------------|---------------------|---------------------|-----------------------------------------|---------------------|---------------------|
|                                                | No                                     | Yes                | Total               | No                                   | Yes                | Total             | No                                     | Yes                | Total             | No                                    | Yes                 | Total               | No                                      | Yes                 | Total               |
|                                                | 1,477,144<br>(42%)                     | 2,052,643<br>(58%) | 3,529,787           | 659,256<br>(36%)                     | 1,149,555<br>(64%) | 1,808,811         | 885,315<br>(29%)                       | 2,149,260<br>(71%) | 3,034,575         | 1,530,178<br>(33%)                    | 3,135,900<br>(67%)  | 4,666,078           | 740,385<br>(17%)                        | 3,662,747<br>(83%)  | 4,403,132           |
| <b>Number of years since graduation, N (%)</b> |                                        |                    |                     |                                      |                    |                   |                                        |                    |                   |                                       |                     |                     |                                         |                     |                     |
| 0-<16y                                         | 186,726<br>(39.0)                      | 291,639<br>(61.0)  | 478,365<br>(13.6)   | 87,408<br>(34.3)                     | 167,723<br>(65.7)  | 255,131<br>(14.1) | 228,976<br>(32.2)                      | 367,890<br>(74.4)  | 494,319<br>(16.3) | 226,681<br>(33.7)                     | 446,417<br>(66.3)   | 673,098<br>(14.4)   | 109,519<br>(17.9)                       | 502,191<br>(82.1)   | 611,710<br>(13.9)   |
| 16-<25                                         | 358,975<br>(40.2)                      | 534,773<br>(59.8)  | 893,748<br>(25.3)   | 165,283<br>(35.3)                    | 302,307<br>(64.7)  | 467,590<br>(25.9) | 236,475<br>(27.2)                      | 633,726<br>(72.8)  | 870,201<br>(28.7) | 405,632<br>(32.3)                     | 850,865<br>(67.7)   | 1,256,497<br>(26.9) | 188,418<br>(16.4)                       | 502,191<br>(82.1)   | 1,150,352<br>(26.1) |
| 25-<35                                         | 485,735<br>(41.0)                      | 699,462<br>(59.0)  | 1,185,197<br>(33.6) | 219,100<br>(35.7)                    | 394,545<br>(64.3)  | 613,645<br>(33.9) | 284,119<br>(28.5)                      | 712,669<br>(71.5)  | 996,788<br>(32.8) | 507,939<br>(32.6)                     | 1,051,560<br>(67.4) | 1,256,497<br>(26.9) | 244,419<br>(16.7)                       | 1,219,385<br>(83.3) | 1,463,804<br>(33.2) |
| 35+                                            | 445,708<br>(45.8)                      | 526,769<br>(54.2)  | 972,477<br>(27.6)   | 187,465<br>(39.7)                    | 394,545<br>(64.3)  | 472,445<br>(26.1) | 238,292<br>(35.4)                      | 434,975<br>(64.6)  | 673,267<br>(22.2) | 389,926<br>(33.1)                     | 787,058<br>(66.9)   | 1,176,984<br>(25.2) | 198,029<br>(16.8)                       | 979,237<br>(83.2)   | 1,177,266<br>(26.7) |

Confidential

**Supplementary Table 4. Descriptive Statistics of patients without an identifiable physician.**

|                                             | Colorectal Screening? (50-74) |                  |                   | Breast Screening? (50-74 y) |              |                   | Cervical Screening? (30-69 y) |                  |                    | Glucose Screening? (40-74 y) |                  |                   | Cholesterol Screening? (50-74) |                  |                   |
|---------------------------------------------|-------------------------------|------------------|-------------------|-----------------------------|--------------|-------------------|-------------------------------|------------------|--------------------|------------------------------|------------------|-------------------|--------------------------------|------------------|-------------------|
|                                             | No                            | Yes              | Total             | No                          | Yes          | Total             | No                            | Yes              | Total              | No                           | Yes              | Total             | No                             | Yes              | Total             |
|                                             | 153,260<br>(88%)              | 21,256<br>(12%)  | 174,516           | 57,257<br>(88%)             | 7,509 (12%)  | 64,766            | 116,667<br>(86%)              | 18,935<br>(14%)  | 135,602            | 273,655<br>(92%)             | 25,024<br>(8%)   | 298,679           | 207,149<br>(77%)               | 63,295<br>(23%)  | 270,444           |
| <b>Baseline Characteristics</b>             |                               |                  |                   |                             |              |                   |                               |                  |                    |                              |                  |                   |                                |                  |                   |
| <b>Sex, N (%)</b>                           |                               |                  |                   |                             |              |                   |                               |                  |                    |                              |                  |                   |                                |                  |                   |
| F                                           | 56,711<br>(87.1)              | 8,372 (12.9)     | 65,083<br>(37.3)  | 57,257<br>(88.4)            | 7,509 (11.6) | 64,766<br>(100.0) | 116,667<br>(86.0)             | 18,935<br>(14.0) | 135,602<br>(100.0) | 90,788<br>(89.4)             | 10,724<br>(10.6) | 101,512<br>(34.0) | 46,136<br>(70.7)               | 19,147<br>(29.3) | 65,283<br>(24.1)  |
| M                                           | 96,549<br>(88.2)              | 8,372 (12.9)     | 109,433<br>(62.7) | 0 (0)                       | 0 (0)        | 0 (0)             |                               |                  |                    | 182,867<br>(92.7)            | 14,300<br>(7.3)  | 197,167<br>(66.0) | 161,013<br>(78.5)              | 44,148<br>(21.5) | 205,161<br>(75.9) |
| <b>Age, N (%)</b>                           |                               |                  |                   |                             |              |                   |                               |                  |                    |                              |                  |                   |                                |                  |                   |
| 30-34                                       |                               |                  |                   |                             |              |                   | 18,286<br>(84.0)              | 3,474<br>(16.0)  | 21,760<br>(16.0)   |                              |                  |                   |                                |                  |                   |
| 35-39                                       |                               |                  |                   |                             |              |                   | 17,195<br>(85.0)              | 3,041<br>(15.0)  | 20,236<br>(14.9)   |                              |                  |                   |                                |                  |                   |
| 40-44                                       |                               |                  |                   |                             |              |                   | 16,889<br>(85.1)              | 2,946<br>(14.9)  | 19,835<br>(14.6)   | 64,088<br>(95.0)             | 3,408<br>(5.0)   | 67,496<br>(22.6)  | 161,013<br>(78.5)              | 7,617<br>(15.9)  | 47,997<br>(17.7)  |
| 45-49                                       |                               |                  |                   |                             |              |                   | 16,712<br>(84.9)              | 2,972<br>(15.1)  | 19,684<br>(14.5)   | 63,268<br>(93.7)             | 4,275<br>(6.3)   | 67,543<br>(22.6)  | 39,345<br>(81.5)               | 8,953<br>(18.5)  | 48,298<br>(17.9)  |
| 50-54                                       | 53,953<br>(91.3)              | 5,112 (8.7)      | 59,065<br>(33.8)  | 17,307<br>(91.0)            | 1,720 (9.0)  | 19,027<br>(29.4)  | 15,027<br>(85.6)              | 2,532<br>(14.4)  | 17,559<br>(12.9)   | 52,420<br>(92.0)             | 4,579<br>(8.0)   | 56,999<br>(19.1)  | 45,153<br>(76.5)               | 13,890<br>(23.5) | 59,043<br>(21.8)  |
| 55-59                                       | 39,425<br>(87.5)              | 5,631 (12.5)     | 59,065<br>(33.8)  | 14,273<br>(87.1)            | 2,118 (12.9) | 16,391<br>(25.3)  | 13,122<br>(87.2)              | 1,926<br>(12.8)  | 15,048<br>(11.1)   | 38,658<br>(90.1)             | 4,224<br>(9.9)   | 42,882<br>(14.4)  | 33,179<br>(73.7)               | 11,811<br>(26.3) | 44,990<br>(16.6)  |
| 60-64                                       | 27,635<br>(86.0)              | 4,504 (14.0)     | 32,139<br>(18.4)  | 14,273<br>(87.1)            | 1,662 (13.4) | 12,386<br>(19.1)  | 10,201<br>(89.6)              | 1,186<br>(10.4)  | 11,387<br>(8.4)    | 26,420<br>(86.2)             | 3,486<br>(13.8)  | 29,906<br>(11.7)  | 23,030<br>(69.4)               | 8,999<br>(30.6)  | 32,029<br>(11.8)  |
| 65-69                                       | 18,289<br>(84.5)              | 3,364 (15.5)     | 21,653<br>(12.4)  | 8,080<br>(87.4)             | 1,164 (12.6) | 9,244 (14.3)      | 7,923<br>(91.2)               | 766 (8.8)        | 8,689<br>(6.4)     | 16,847<br>(86.2)             | 2,695<br>(13.8)  | 19,542<br>(6.5)   | 14,966<br>(69.4)               | 6,608<br>(30.6)  | 21,574<br>(8.0)   |
| 70-74                                       | 13,958<br>(84.1)              | 2,645 (15.9)     | 16,603 (9.5)      | 8,080<br>(87.4)             | 845 (10.9)   | 7,718 (11.9)      | 1,312<br>(93.4)               | 92 (6.6)         | 1,404<br>(1.0)     | 11,954<br>(83.5)             | 2,357<br>(16.5)  | 14,311<br>(4.8)   | 11,096<br>(67.2)               | 5,417<br>(32.8)  | 16,513<br>(6.1)   |
| <b>Immigrant status, N (%)</b>              |                               |                  |                   |                             |              |                   |                               |                  |                    |                              |                  |                   |                                |                  |                   |
| Recent immigrant (<8y)                      | 6,190 (94.3)                  | 372 (5.7)        | 6,562 (3.8)       | 2,835<br>(95.0)             | 149 (5.0)    | 2,984 (4.6)       | 9,486<br>(87.0)               | 1,417<br>(13.0)  | 10,903<br>(8.0)    | 13,340<br>(93.8)             | 883 (6.2)        | 14,223<br>(4.8)   | 8,009<br>(69.6)                | 3,495<br>(30.4)  | 11,504<br>(4.3)   |
| Non-distant immigrant (<16y)                | 9,243 (94.1)                  | 582 (5.9)        | 9,825 (5.6)       | 3,969<br>(96.5)             | 144 (3.5)    | 4,113 (6.4)       | 12,683<br>(92.9)              | 971 (7.1)        | 13,654<br>(10.1)   | 21,486<br>(96.2)             | 844 (3.8)        | 22,330<br>(7.5)   | 13,679<br>(74.6)               | 4,658<br>(25.4)  | 18,337<br>(6.8)   |
| Distant immigrant (<28 y)                   | 11,482<br>(92.2)              | 967 (7.8)        | 12,449 (7.1)      | 4,394<br>(93.7)             | 293 (6.3)    | 4,687 (7.2)       | 8,623<br>(90.4)               | 913 (9.6)        | 9,536<br>(7.0)     | 19,573<br>(93.3)             | 1,398<br>(6.7)   | 20,971<br>(7.0)   | 13,964<br>(72.9)               | 5,202<br>(27.1)  | 19,166<br>(7.1)   |
| Non-immigrant (28+ years)                   | 126,345<br>(86.7)             | 19,335<br>(13.3) | 145,680<br>(83.5) | 46,059<br>(86.9)            | 6,923 (13.1) | 52,982<br>(81.8)  | 85,875<br>(84.6)              | 15,634<br>(15.4) | 101,509<br>(74.9)  | 219,256<br>(90.9)            | 21,899<br>(9.1)  | 241,155<br>(80.7) | 171,497<br>(77.4)              | 49,940<br>(22.6) | 221,437<br>(81.9) |
| <b>DA-level Characteristics</b>             |                               |                  |                   |                             |              |                   |                               |                  |                    |                              |                  |                   |                                |                  |                   |
| <b>Neighbourhood Income Quintile, N (%)</b> |                               |                  |                   |                             |              |                   |                               |                  |                    |                              |                  |                   |                                |                  |                   |
| Q1                                          | 31,097<br>(90.3)              | 3,338 (9.7)      | 34,435<br>(19.7)  | 11,209<br>(91.3)            | 1,069 (8.7)  | 12,278<br>(19.0)  | 24,677<br>(87.9)              | 3,405<br>(12.1)  | 28,082<br>(20.7)   | 54,891<br>(91.4)             | 5,161<br>(8.6)   | 60,052<br>(20.1)  | 41,830<br>(76.8)               | 12,649<br>(23.2) | 54,479<br>(20.1)  |
| Q2                                          | 31,097<br>(90.3)              | 2,646 (8.8)      | 29,918<br>(17.1)  | 10,069<br>(91.4)            | 950 (8.6)    | 11,019<br>(17.0)  | 21,276<br>(88.6)              | 2,743<br>(11.4)  | 24,019<br>(17.7)   | 48,393<br>(92.6)             | 3,889<br>(7.4)   | 52,282<br>(17.5)  | 36,493<br>(77.4)               | 10,684<br>(22.6) | 47,177<br>(17.4)  |
| Q3                                          | 24,216<br>(89.8)              | 2,765 (10.2)     | 26,981<br>(15.5)  | 9,209<br>(90.4)             | 980 (9.6)    | 10,189<br>(15.7)  | 19,117<br>(87.7)              | 2,680<br>(12.3)  | 21,797<br>(16.1)   | 43,703<br>(92.5)             | 3,889<br>(7.4)   | 47,258<br>(15.8)  | 32,729<br>(76.8)               | 9,898<br>(23.2)  | 42,627<br>(15.8)  |
| Q4                                          | 23,727<br>(88.4)              | 3,113 (11.6)     | 26,840<br>(15.4)  | 9,015<br>(89.4)             | 980 (9.6)    | 10,082<br>(15.6)  | 18,691<br>(87.1)              | 2,756<br>(12.9)  | 21,447<br>(15.8)   | 43,139<br>(92.0)             | 3,758<br>(8.0)   | 46,897<br>(15.7)  | 32,141<br>(76.3)               | 9,966<br>(23.7)  | 42,107<br>(15.6)  |
| Q5                                          | 23,727<br>(88.4)              | 5,022 (17.1)     | 29,434<br>(16.9)  | 9,835<br>(88.0)             | 1,344 (12.0) | 11,179<br>(17.3)  | 19,672<br>(85.9)              | 3,225<br>(14.1)  | 22,897<br>(16.9)   | 44,988<br>(90.9)             | 4,486<br>(9.1)   | 49,474<br>(16.6)  | 33,284<br>(75.1)               | 11,021<br>(24.9) | 44,305<br>(16.4)  |
| Rural                                       | 22,536<br>(83.8)              | 5,022 (17.1)     | 26,908<br>(15.4)  | 7,920<br>(79.0)             | 2,099 (21.0) | 10,019<br>(15.5)  | 13,234<br>(76.2)              | 4,126<br>(23.8)  | 17,360<br>(12.8)   | 38,541<br>(90.2)             | 4,175<br>(9.8)   | 42,716<br>(14.3)  | 30,672<br>(77.2)               | 9,077<br>(22.8)  | 39,749<br>(14.7)  |

**Supplementary Table 4.** Descriptive Statistics of patients without an identifiable physician.

|                                                                    | Colorectal Screening? (50-74) |                        |                            | Breast Screening? (50-74 y) |                            |                            | Cervical Screening? (30-69 y) |                            |                           | Glucose Screening? (40-74 y) |                            |                            | Cholesterol Screening? (50-74) |                            |                            |
|--------------------------------------------------------------------|-------------------------------|------------------------|----------------------------|-----------------------------|----------------------------|----------------------------|-------------------------------|----------------------------|---------------------------|------------------------------|----------------------------|----------------------------|--------------------------------|----------------------------|----------------------------|
|                                                                    | No                            | Yes                    | Total                      | No                          | Yes                        | Total                      | No                            | Yes                        | Total                     | No                           | Yes                        | Total                      | No                             | Yes                        | Total                      |
|                                                                    | 153,260<br>(88%)              | 21,256<br>(12%)        | 174,516                    | 57,257<br>(88%)             | 7,509 (12%)                | 64,766                     | 116,667<br>(86%)              | 18,935<br>(14%)            | 135,602                   | 273,655<br>(92%)             | 25,024<br>(8%)             | 298,679                    | 207,149<br>(77%)               | 63,295<br>(23%)            | 270,444                    |
| <b>% of DA who have not completed high school, N (%)</b>           |                               |                        |                            |                             |                            |                            |                               |                            |                           |                              |                            |                            |                                |                            |                            |
| Mean                                                               | 19.53 ±<br>11.82              | 19.57 ±<br>13.74       | 19.53 ±<br>12.07           | 18.98 ±<br>11.83            | 22.22<br>±14.54            | 19.36 ±<br>12.22           | 18.20 ±<br>11.70              | 21.64 ±<br>15.53           | 18.68 7<br>12.37          | 19.16 ±<br>11.82             | 20.58 ±<br>12.36           | 19.28 ±<br>11.87           | 19.36 ±<br>11.56               | 20.00 ±<br>13.41           | 19.51 ±<br>12.02           |
| Median (IQR)                                                       | 18.03<br>(10.68-<br>26.48)    | 17.43 (9.29-<br>27.40) | 18.00<br>(10.53-<br>26.61) | 17.44<br>(10.14-<br>25.71)  | 20.00<br>(12.00-<br>30.00) | 17.74<br>(10.30-<br>26.26) | 16.47<br>(9.52-<br>24.64)     | 18.94<br>(10.61-<br>28.63) | 16.76<br>(9.65-<br>25.22) | 17.65<br>(10.31-<br>26.00)   | 19.05<br>(11.11-<br>28.42) | 17.74<br>(10.39-<br>26.23) | 18.01<br>(10.59-<br>26.47)     | 17.91<br>(10.45-<br>26.79) | 18.00<br>(10.53-<br>26.53) |
| Range                                                              | 0.00-100.00                   | 0.00-100.00            | 0.00-100.00                | 0.00-<br>100.00             | 0.00-91.18                 | 0.00-100.00                | 0.00-<br>100.00               | 0.00-<br>100.00            | 0.00-<br>100.00           | 0.00-<br>100.00              | 0.00-<br>100.00            | 0.00-<br>100.00            | 0.00-<br>100.00                | 0.00-<br>100.00            | 0.00-<br>100.00            |
| <b>% of DA whose home language is not English or French, N (%)</b> |                               |                        |                            |                             |                            |                            |                               |                            |                           |                              |                            |                            |                                |                            |                            |
| 0                                                                  | 81,916<br>(86.2)              | 13,128<br>(13.8)       | 95,044<br>(54.5)           | 29,897<br>(85.7)            | 4,996 (14.3)               | 34,893<br>(53.9)           | 55,372<br>(83.6)              | 10,839<br>(16.4)           | 66,211<br>(48.8)          | 143,689<br>(90.5)            | 15,060<br>(9.5)            | 158,749<br>(53.2)          | 112,708<br>(77.8)              | 32,169<br>(22.2)           | 144,877<br>(53.6)          |
| Low                                                                | 34,368<br>(88.9)              | 4,306 (11.1)           | 38,674<br>(22.2)           | 13,163<br>(90.9)            | 1,315 (9.1)                | 14,478<br>(22.4)           | 28,597<br>(87.7)              | 4,018<br>(12.3)            | 32,615<br>(24.1)          | 62,820<br>(92.4)             | 5,190<br>(7.6)             | 68,010<br>(22.8)           | 46,485<br>(76.5)               | 14,308<br>(23.5)           | 60,793<br>(22.5)           |
| High                                                               | 36,976<br>(90.6)              | 3,822 (9.4)            | 40,798<br>(23.4)           | 14,197<br>(92.2)            | 1,198 (7.8)                | 15,395<br>(23.8)           | 32,698<br>(88.9)              | 4,078<br>(11.1)            | 36,776<br>(27.1)          | 67,146<br>(93.4)             | 4,774<br>(6.6)             | 71,920<br>(24.1)           | 47,956<br>(74.0)               | 16,818<br>(26.0)           | 64,774<br>(24.0)           |

## STROBE Statement—checklist of items that should be included in reports of observational studies

|                              | Item No | Recommendation                                                                                                                                                                                                                                                                                                                                                                                                                                                                                                                                                                                                                                                                                   |
|------------------------------|---------|--------------------------------------------------------------------------------------------------------------------------------------------------------------------------------------------------------------------------------------------------------------------------------------------------------------------------------------------------------------------------------------------------------------------------------------------------------------------------------------------------------------------------------------------------------------------------------------------------------------------------------------------------------------------------------------------------|
| <b>Title and abstract</b>    | 1       | (a) Indicate the study's design with a commonly used term in the title or the abstract<br>(b) Provide in the abstract an informative and balanced summary of what was done and what was found                                                                                                                                                                                                                                                                                                                                                                                                                                                                                                    |
| <b>Introduction</b>          |         |                                                                                                                                                                                                                                                                                                                                                                                                                                                                                                                                                                                                                                                                                                  |
| Background/rationale         | 2       | Explain the scientific background and rationale for the investigation being reported                                                                                                                                                                                                                                                                                                                                                                                                                                                                                                                                                                                                             |
| Objectives                   | 3       | State specific objectives, including any prespecified hypotheses                                                                                                                                                                                                                                                                                                                                                                                                                                                                                                                                                                                                                                 |
| <b>Methods</b>               |         |                                                                                                                                                                                                                                                                                                                                                                                                                                                                                                                                                                                                                                                                                                  |
| Study design                 | 4       | Present key elements of study design early in the paper                                                                                                                                                                                                                                                                                                                                                                                                                                                                                                                                                                                                                                          |
| Setting                      | 5       | Describe the setting, locations, and relevant dates, including periods of recruitment, exposure, follow-up, and data collection                                                                                                                                                                                                                                                                                                                                                                                                                                                                                                                                                                  |
| Participants                 | 6       | (a) <i>Cohort study</i> —Give the eligibility criteria, and the sources and methods of selection of participants. Describe methods of follow-up<br><i>Case-control study</i> —Give the eligibility criteria, and the sources and methods of case ascertainment and control selection. Give the rationale for the choice of cases and controls<br><i>Cross-sectional study</i> —Give the eligibility criteria, and the sources and methods of selection of participants<br>(b) <i>Cohort study</i> —For matched studies, give matching criteria and number of exposed and unexposed<br><i>Case-control study</i> —For matched studies, give matching criteria and the number of controls per case |
| Variables                    | 7       | Clearly define all outcomes, exposures, predictors, potential confounders, and effect modifiers. Give diagnostic criteria, if applicable                                                                                                                                                                                                                                                                                                                                                                                                                                                                                                                                                         |
| Data sources/<br>measurement | 8*      | For each variable of interest, give sources of data and details of methods of assessment (measurement). Describe comparability of assessment methods if there is more than one group                                                                                                                                                                                                                                                                                                                                                                                                                                                                                                             |
| Bias                         | 9       | Describe any efforts to address potential sources of bias                                                                                                                                                                                                                                                                                                                                                                                                                                                                                                                                                                                                                                        |
| Study size                   | 10      | Explain how the study size was arrived at                                                                                                                                                                                                                                                                                                                                                                                                                                                                                                                                                                                                                                                        |
| Quantitative variables       | 11      | Explain how quantitative variables were handled in the analyses. If applicable, describe which groupings were chosen and why                                                                                                                                                                                                                                                                                                                                                                                                                                                                                                                                                                     |
| Statistical methods          | 12      | (a) Describe all statistical methods, including those used to control for confounding<br>(b) Describe any methods used to examine subgroups and interactions<br>(c) Explain how missing data were addressed<br>(d) <i>Cohort study</i> —If applicable, explain how loss to follow-up was addressed<br><i>Case-control study</i> —If applicable, explain how matching of cases and controls was addressed<br><i>Cross-sectional study</i> —If applicable, describe analytical methods taking account of sampling strategy<br>(e) Describe any sensitivity analyses                                                                                                                                |

Continued on next page



**Results**

|                  |     |                                                                                                                                                                                                                                                                                                                                                                                                               |
|------------------|-----|---------------------------------------------------------------------------------------------------------------------------------------------------------------------------------------------------------------------------------------------------------------------------------------------------------------------------------------------------------------------------------------------------------------|
| Participants     | 13* | (a) Report numbers of individuals at each stage of study—eg numbers potentially eligible, examined for eligibility, confirmed eligible, included in the study, completing follow-up, and analysed<br>(b) Give reasons for non-participation at each stage<br>(c) Consider use of a flow diagram                                                                                                               |
| Descriptive data | 14* | (a) Give characteristics of study participants (eg demographic, clinical, social) and information on exposures and potential confounders<br>(b) Indicate number of participants with missing data for each variable of interest<br>(c) <i>Cohort study</i> —Summarise follow-up time (eg, average and total amount)                                                                                           |
| Outcome data     | 15* | <i>Cohort study</i> —Report numbers of outcome events or summary measures over time<br><i>Case-control study</i> —Report numbers in each exposure category, or summary measures of exposure<br><i>Cross-sectional study</i> —Report numbers of outcome events or summary measures                                                                                                                             |
| Main results     | 16  | (a) Give unadjusted estimates and, if applicable, confounder-adjusted estimates and their precision (eg, 95% confidence interval). Make clear which confounders were adjusted for and why they were included<br>(b) Report category boundaries when continuous variables were categorized<br>(c) If relevant, consider translating estimates of relative risk into absolute risk for a meaningful time period |
| Other analyses   | 17  | Report other analyses done—eg analyses of subgroups and interactions, and sensitivity analyses                                                                                                                                                                                                                                                                                                                |

**Discussion**

|                  |    |                                                                                                                                                                            |
|------------------|----|----------------------------------------------------------------------------------------------------------------------------------------------------------------------------|
| Key results      | 18 | Summarise key results with reference to study objectives                                                                                                                   |
| Limitations      | 19 | Discuss limitations of the study, taking into account sources of potential bias or imprecision. Discuss both direction and magnitude of any potential bias                 |
| Interpretation   | 20 | Give a cautious overall interpretation of results considering objectives, limitations, multiplicity of analyses, results from similar studies, and other relevant evidence |
| Generalisability | 21 | Discuss the generalisability (external validity) of the study results                                                                                                      |

**Other information**

|         |    |                                                                                                                                                               |
|---------|----|---------------------------------------------------------------------------------------------------------------------------------------------------------------|
| Funding | 22 | Give the source of funding and the role of the funders for the present study and, if applicable, for the original study on which the present article is based |
|---------|----|---------------------------------------------------------------------------------------------------------------------------------------------------------------|

\*Give information separately for cases and controls in case-control studies and, if applicable, for exposed and unexposed groups in cohort and cross-sectional studies.

**Note:** An Explanation and Elaboration article discusses each checklist item and gives methodological background and published examples of transparent reporting. The STROBE checklist is best used in conjunction with this article (freely available on the Web sites of PLoS Medicine at <http://www.plosmedicine.org/>, Annals of Internal Medicine at <http://www.annals.org/>, and Epidemiology at <http://www.epidem.com/>). Information on the STROBE Initiative is available at [www.strobe-statement.org](http://www.strobe-statement.org).
